# Supplementary material for: Anti-PD-L1-Based Bispecific Antibodies Targeting Co-Inhibitory and Co-Stimulatory Molecules for Cancer Immunotherapy
Source: MDPI journal article supplement (doi:10.3390/molecules29020454), 2024-01-17
Supplement: s1 [file s1]

## Supporting information

# Anti-PD-L1 Based Bispecific Antibodies Targeting Co-Inhibitory and Co-Stimulatory Molecules For Cancer Immunotherapy

Qiaohong Geng<sup>a,b\*</sup> and Peifu Jiao<sup>a\*</sup>

<sup>a</sup> School of Chemistry and Chemical Engineering, Qilu Normal University, Jinan, Shandong 250200, China

<sup>b</sup> Shandong Shining Pharm Co.,Ltd., Jinan, Shandong 250102, China

\* Correspondences: Gengqh2006@163.com (Q.G.); Jiaopf2006@163.com (P.J.)

**Table S1** Detailed sequence information of each anti-PD-L1 based bsAbs.

| BsAb   | Targets      | Sequence                                                                                                                                                                                                                                                                                                                                                                                                                                                                                                                                                                                                                                                                                                                                                                                                                                                                                                                                                     |
|--------|--------------|--------------------------------------------------------------------------------------------------------------------------------------------------------------------------------------------------------------------------------------------------------------------------------------------------------------------------------------------------------------------------------------------------------------------------------------------------------------------------------------------------------------------------------------------------------------------------------------------------------------------------------------------------------------------------------------------------------------------------------------------------------------------------------------------------------------------------------------------------------------------------------------------------------------------------------------------------------------|
| BCP-84 | CTLA-4×PD-L1 | <p>Heavy chain fusion polypeptide</p> <p>EVQLVESGGGLVQPGGSLRLSCAASGYTYSRHCLGWFRQAPGKGREAVSTIDSDGSTSYADSVKGRF<br/>TISRDNAKNTLYLQMNSLRPEDTAVYYCAIGPNPRYCSGAPNTRGAEHYFGYWGQGLTVTVSSEPKS<br/>SDKTHTSPSPPEVQLVESGGGLVQPGGSLRLSCAASGFTFSDSWIHWVRQAPGKGLEWVAWISPYGG<br/>STYYADSVKGRFTISADTSKNTAYLQMNSLRAEDTAVYYCARRHWPGGFDYWGQGLTVTVSSAST<br/>KGPSVFPLAPSSKSTSGGTAALGCLVKDYFPEPVTVSWNSGALTSGVHTFPAVLQSSGLYSLSSVTV<br/>PSSSLGTQTYICNVNHKPSNTKVDKKVEPKSCDKTHTCPPCPAPELLGGPSVFLFPPKPKDTLMISRT<br/>EVTCTVVDVSHEDPEVKFNWYVDGVEVHNAKTKPREEQYASTYRVVSVLTVLHQDWLNGKEYKC<br/>KVSNAKALPAIEKTISKAKGQPREPQVYTLPPSREEMTKNQVSLTCLVKGFYPSDIAVEWESNGQPEN<br/>NYKTTTPVLDSDGSFFLYSKLTVDKSRWQQGNVFSCVMHEALHNHYTQKSLSLSPG</p> <p>Light chain</p> <p>DIQMTQSPSSLSASVGDRVTITCRASQDVSTAVAWYQQKPGKAPKLLIYSASFLYSGVPSRFSGSGS<br/>TDFTLTISLQPEDFATYYCQQYLHPATFGQGTKVEIKRTVAAPSVFIFPPSDEQLKSGTASVCLLN<br/>NFYPREAKVQWKVDNALQSGNSQESVTEQDSKSTYLSSTLTLSKADYEKHKVYACEVTHQGLSS<br/>PVTKSFNRGEC</p> |
| BCP-85 | CTLA-4×PD-L1 | <p>Heavy chain fusion polypeptide</p> <p>EVQLVESGGGLVQPGGSLRLSCAASGDSVSNYMGWFRQAPGKGREEVSSIYPTGGTFYTDVSKGRF<br/>TISRDNAKNTLYLQMNSLRPEDTAVYYCAAGKWGTDYWGQGLTVTVSSEPKSSDKTHTSPSPPEVQ<br/>LVESGGGLVQPGGSLRLSCAASGFTFSDSWIHWVRQAPGKGLEWVAWISPYGGSTYYADSVKGRFTI<br/>SADTSKNTAYLQMNSLRAEDTAVYYCARRHWPGGFDYWGQGLTVTVSSASTKGPSVFPLAPSSKST<br/>SGGTAALGCLVKDYFPEPVTVSWNSGALTSGVHTFPAVLQSSGLYSLSSVTVPPSSSLGTQTYICNVN<br/>HKPSNTKVDKKVEPKSCDKTHTCPPCPAPELLGGPSVFLFPPKPKDTLMISRTPEVTCVVDVSHEDP<br/>EVKFNWYVDGVEVHNAKTKPREEQYASTYRVVSVLTVLHQDWLNGKEYKCKVSNKALPAIEKTIS<br/>KAKGQPREPQVYTLPPSREEMTKNQVSLTCLVKGFYPSDIAVEWESNGQPENNYKTTTPVLDSDGSF<br/>FLYSKLTVDKSRWQQGNVFSCVMHEALHNHYTQKSLSLSP</p> <p>Light chain</p> <p>DIQMTQSPSSLSASVGDRVTITCRASQDVSTAVAWYQQKPGKAPKLLIYSASFLYSGVPSRFSGSGS<br/>TDFTLTISLQPEDFATYYCQQYLHPATFGQGTKVEIKRTVAAPSVFIFPPSDEQLKSGTASVCLLN<br/>NFYPREAKVQWKVDNALQSGNSQESVTEQDSKSTYLSSTLTLSKADYEKHKVYACEVTHQGLSS<br/>PVTKSFNRGEC</p>                  |
| AB-04  | CTLA-4×PD-L1 | <p>Anti-PD-L1 Variable heavy chain</p> <p>QVQLQESGPGLVKPSETLSITCTVSGFSLSNYDISWIRQPPGKGLEWLGVITWGATNYPALKSRLTI<br/>SRDNSKNQVSLKMSSVTAADTAVYYCVRDSNRYDEPFTYWGQGLTVTVSS</p>                                                                                                                                                                                                                                                                                                                                                                                                                                                                                                                                                                                                                                                                                                                                                                                     |

|           |              |                                                                                                                                                                                                                                                                                                                                                                                                                                                                                                                                                                                                                                                                                                                                                                                                                                                                                                                                                                                                  |
|-----------|--------------|--------------------------------------------------------------------------------------------------------------------------------------------------------------------------------------------------------------------------------------------------------------------------------------------------------------------------------------------------------------------------------------------------------------------------------------------------------------------------------------------------------------------------------------------------------------------------------------------------------------------------------------------------------------------------------------------------------------------------------------------------------------------------------------------------------------------------------------------------------------------------------------------------------------------------------------------------------------------------------------------------|
|           |              | <p>Anti-PD-L1 Variable light chain</p> <p>EIVLTQSPDTLSVTPKEKVTLCRASQSIGTNIHWFQQKPGQSPKLLIKYASESISGVPSRFSGSGSGTD</p> <p>FTLTINSVEAEDAATYYCQQSNSWPYTFGQCTKLEIK</p> <p>Anti-CTLA-4 Variable heavy chain</p> <p>QVQLVESGGGVVQPGRSLRLSCAASGFTFSSYTMHWVRQAPGKCLEWVTFISYDGNKYYADSVK</p> <p>GRFTISRDN SKNTLYLQMNSLRAEDTAIYYCARTGWLGPFDYWGQGT LTVSS</p> <p>Anti-CTLA-4 Variable light chain</p> <p>EIVLTQSPGTLSLSPGERATLSCRASQSVGSSYLAWYQQKPGQAPRLLIYGAFSRATGIPDRFSGSGSG</p> <p>TDFTLTISRLEPEDFAVYYCQQYGSSPWTFGCGTKVEIK</p>                                                                                                                                                                                                                                                                                                                                                                                                                                                                               |
| KN-046    | CTLA-4×PD-L1 | <p>QVQLVESGGGLVQPGGSLRLSCAASGKMSSRRRCMAWFRQAPGKERERVAKLLTSGSTYLADSVK</p> <p>GRFTISRDN SKNTVY LQMNSLRAEDTAVYYCAADSFEDPTCTLVTS SGAFQYWGQGT LTVSSGAP</p> <p>QVQLVESGGGLVQPGGSLRLSCAASGYIYSAYCMGWFRQAPGKGLEGVAAIYIGGGSTYYADSVKG</p> <p>RFTISRDN SKNTLY LQMNSLRAEDTAVYYCAADV IPTETCLGGSWSGPF GYWGQGT LTVSSGSEPK</p> <p>SSDKTHTCPPCPAPELLGGPSVFLFPPKPKDTLMISRTPEVTCVVVDVSHEDPEVKFNWYVDGVEVH</p> <p>NAKTKPREEQYNSTYRVVSVLTVLHQDWLNGKEYKCKVSNKALPAPIEKTISKAKGQPREPQVYTL</p> <p>PSRDELTKNQVSLTCLVKGFYPSDIAVEWESNGQPENNYKTPPVLDSDGSFFLYSKLTVDKSRWQQ</p> <p>GNVFSCSVMHEALHNHYTQKSLSLSPGK</p>                                                                                                                                                                                                                                                                                                                                                                                                                |
| PR-001573 | CTLA-4×PD-L1 | <p>Polypeptide chain 1</p> <p>DIQMTQSPSTLSASVGDRVTVTCRASQSIYIWLAWYQQKPGKAPNLLIYKASSLETGVPSRFSGSGSG</p> <p>TEFTLTISSLQPD FATYYCQQYYGSSRTFGQGTKVEIKRTVAAPSVFIFPPSDEQLKSGTASVCLLN</p> <p>NFYPREAKVQWKVDNALQSGNSQESVTEQDSKDYSLSTLTLSKADYEKHKVYACEVTHQGLSS</p> <p>PVTKSFNRGEC</p> <p>Polypeptide chain 2</p> <p>EVQLVESGGGLIQPGGSLRLSCAVSGFTVSKNYMSWVRQAPGKGLEWVSVVYSGGSKTYADSVKG</p> <p>RFTISRDN SKNTLY LQMNSLRAEDTAVYYCARAVHPSPSSFDIWGQGTMTVTVSSKLEPKSSDKTHTP</p> <p>PPPPRTEVQLVESGGGLVQPGGSLRLSCAASGFTFSSYWMSWVRQAPGKGLEWVANIKQEGSEKYY</p> <p>VDSVKGRFTISRDN AKNSLY LQMNSLRAEDTAVYYCARDRAVAGAFDIWGQGTMTVTVSSASTKGPS</p> <p>VFPLAPSSKSTSGGTAALGCLVKDYFPEPVTVSWNSGALTSGVHTFPAVLQSSGLYSLSSVTVPS</p> <p>SS LGTQTYICNVNHKPSNTKVDKKVEPKSCDKTHTCPPCPAPELLGGPSVFLFPPKPKDTLMISRTPEVTC</p> <p>VVVDVSHEDPEVKFNWYVDGVEVHNAKTKPREEQYNSTYRVVSVLTVLHQDWLNGKEYKCKVSN</p> <p>KALPAPIEKTISKAKGQPREPQVYTLPPSREEMTKNQVSLTCLVKGFYPSDIAVEWESNGQPENNYKT</p> <p>TPPVLDSDGSFFLYSKLTVDKSRWQQGNVFSCSVMHEALHNHYTQKSLSLSPGK</p> |
| FS118     | LAG-3×PD-L1  | <p>Heavy chain</p> <p>EVQLVESGGGLVQPGRSLRLSCAASGFTFDDYAMHWVRQTPGKGLEWVSGISWKSNIIGYADSVKG</p> <p>RFTISRDN AKNSLY LQMNSLRAEDTALYYCARDITGSGSYGWFDPWGQGT LTVSSASTKGPSVFPL</p> <p>APSSKSTSGGTAALGCLVKDYFPEPVTVSWNSGALTSGVHTFPAVLQSSGLYSLSSWTVPSSSLGT</p> <p>QTYICNVNHKPSNTKVDKKVEPKSCDKTHTCPPCPAPEAAGGPSVFLFPPKPKDTLMISRTPEVTCVV</p> <p>VDVSHEDPEVKFNWYVDGVEVHNAKTKPREEQYNSTYRVVSVLTVLHQDWLNGKEYKCKVSNKA</p> <p>LPAPIEKTISKAKGQPREPQVYTLPPSWDEPWGEDVSLTCLVKGFYPSDIAVEWESNGQPENNYKTP</p> <p>PVLDSDGSFFLYSKLTVPYDRVWWPDEFSCSVMHEALHNHYTQKSLSLSPG</p> <p>Light chain</p> <p>DIQMTQSPSSLSASVGDRVTITCRASQSISSYLNWYQQKPGKAPKPLIYVASSLQSGVPSSFSFGSGSGT</p> <p>DFTLTISSLQPEDFATYYCQQSYSNPITFGQGT RLEIKRTVAAPSVFIFPPSDEQLKSGTASVCLLN</p> <p>NFYPREAKVQWKVDNALQSGNSQESVTEQDSKDYSLSTLTLSKADYEKHKVYACEVTHQGLSSPV</p>                                                                                                                                                                                              |

|                       |             |                                                                                                                                                                                                                                                                                                                                                                                                                                                                                                                                                                                                                                                                                                                                                                                                                                                                                                                                                                                                                                                                                                                                                                                                                                                                                                                                                    |
|-----------------------|-------------|----------------------------------------------------------------------------------------------------------------------------------------------------------------------------------------------------------------------------------------------------------------------------------------------------------------------------------------------------------------------------------------------------------------------------------------------------------------------------------------------------------------------------------------------------------------------------------------------------------------------------------------------------------------------------------------------------------------------------------------------------------------------------------------------------------------------------------------------------------------------------------------------------------------------------------------------------------------------------------------------------------------------------------------------------------------------------------------------------------------------------------------------------------------------------------------------------------------------------------------------------------------------------------------------------------------------------------------------------|
|                       |             | <p>TKSFNRGEC</p> <p>CDR1 variable heavy chain</p> <p>GFTFDDYA</p> <p>CDR2 variable heavy chain</p> <p>ISWKSNI</p> <p>CDR3 variable heavy chain</p> <p>ARDITGSGSYGWFD</p> <p>CDR1 variable light chain</p> <p>QSISSY</p> <p>CDR2 variable light chain</p> <p>VAS</p> <p>CDR3 variable light chain</p> <p>QQSYSNPIT</p>                                                                                                                                                                                                                                                                                                                                                                                                                                                                                                                                                                                                                                                                                                                                                                                                                                                                                                                                                                                                                              |
| ABL-501               | LAG-3×PD-L1 | NA                                                                                                                                                                                                                                                                                                                                                                                                                                                                                                                                                                                                                                                                                                                                                                                                                                                                                                                                                                                                                                                                                                                                                                                                                                                                                                                                                 |
| IBI323                | LAG-3×PD-L1 | NA                                                                                                                                                                                                                                                                                                                                                                                                                                                                                                                                                                                                                                                                                                                                                                                                                                                                                                                                                                                                                                                                                                                                                                                                                                                                                                                                                 |
| mPDL1HCv1-<br>E-sLAG3 | LAG-3×PD-L1 | <p>E-linker</p> <p>EPKSSDKTHTSPPSP</p> <p>Heavy chain-linker-sLAG3</p> <p>EVQLVQSGAEVKKPGASVKVSCKASGYIFTGYGITWVRQAPGQGLEWMGEIFPRRVQTYTSEKFKG</p> <p>RVTMTTDTSTSTAYMELRSLRSDDTAVYYCARDYDPYFALDYWGQGTITVTVSSASTKGPSVFPLAP</p> <p>SSKSTSGGTAALGCLVKDYFPEPTVSWNSGALTSGVHTFPAVLQSSGLYSLSSVTVPSSSLGTQTY</p> <p>ICNVNHKPSNTKVDKKVEPKSCDKTHTCPPCPAPELLGGPSVFLFPPKPKDTLMISRTPEVTCVVDV</p> <p>SHEDPEVKFNWYVDGVEVHNAKTKPREEQYASTYRVSVLTVLHQDWLNGKEYKCKVSNKALPAP</p> <p>IEKTISKAKGQPREPQVYTLPPSREEMTKNQVSLTCLVKGFYPSDIAVEWESNGQPENNYKTTTPVLD</p> <p>SDGSFFLYSKLTVDKSRWQQGVFSCSVMHEALHNHYTQKSLSLSPGKEPKSSDKTHTSPPSPEVQLV</p> <p>ESGGGLVQPGGSLRLSCAASGYTVSSYCMGWFRQAPGKGREGVSAIDSDGSVSYADSVKGRFTISKD</p> <p>NSKNTLYLQMNSLRAEDTAVYFCAADLCWVDQDQGEYNTWGQGTITVTVSS</p> <p>Light chain</p> <p>DIQMTQSPSSLSASVGDRVTITCRASQDVSTAVDWYQQKPGKAPKLLIYSASYRYTGVPDRFSGSGS</p> <p>GTDFTFITISLQPEDATYYCQQHYSIPFTFGQGTKLEIKRTVAAPSVFIFPPSDEQLKSGTASVVCCLN</p> <p>NFYPREAKVQWKVDNALQSGNSQESVTEQDSKSTYLSLSTLTLSKADYEKHKVYACEVTHQGLSS</p> <p>PVTKSFNRGEC</p> <p>CDR1 variable heavy chain</p> <p>GYIFTGYGIT</p> <p>CDR2 variable heavy chain</p> <p>EIFPRRVQTYTSEKFKG</p> <p>CDR3 variable heavy chain</p> <p>DYDPYFALDY</p> <p>CDR1 variable light chain</p> <p>RASQDVSTAVD</p> <p>CDR2 variable light chain</p> <p>SASYRYT</p> <p>CDR3 variable light chain</p> <p>QQHYSIPFT</p> |

|             |             |                                                                                                                                                                                                                                                                                                                                                                                                                                                                                                                                                                                                                                                                                                                                                                                                                                                                                                     |
|-------------|-------------|-----------------------------------------------------------------------------------------------------------------------------------------------------------------------------------------------------------------------------------------------------------------------------------------------------------------------------------------------------------------------------------------------------------------------------------------------------------------------------------------------------------------------------------------------------------------------------------------------------------------------------------------------------------------------------------------------------------------------------------------------------------------------------------------------------------------------------------------------------------------------------------------------------|
|             |             | <p>Heavy chain</p> <p>EVQLVQSGAEVKKPGASVKVSCASGYIFTGYGITWVRQAPGQGLEWMGEIFPRRVQTYSEKFKG<br/> RVTMTTDTSTSTAYMELRSLRSDDTAVYYCARDYDPYFALDYWGQGTITVTVSSASTKGPSVFPLAP<br/> SSKSTSGGTAALGCLVKDYFPEPVTVSWNSGALTSGVHTFPAVLQSSGLYSLSSVTVTPSSSLGTQTY<br/> ICNVNHKPSNTKVDKKVEPKSCDKTHTCPPCPAPELLGGPSVFLFPPKPKDTLMISRTPEVTCVVDV<br/> SHEDPEVKFNWYVDGVEVHNAKTKPREEQYASTYRVVSVLTVLHQDWLNGKEYKCKVSNKALPAP<br/> IEKTISKAKGQPREPQVYTLPPSREEMTKNQVSLTCLVKGFYPSDIAVEWESNGQPENNYKTTTPVLD<br/> SDGSFFLYSKLTVDKSRWQQGVFSCSVMEALHNHYTQKSLSLSPGK</p> <p>LAG3 single domain antibody (sdAb)</p> <p>EVQLVESGGGLVQPGGSLRLSCAASGYTVSSYCMGWFRQAPGKGREGVSAIDSDGSVSYADSVKGR<br/> FTISKDNSKNTLYLQMNSLRAEDTAVYFCAADLCWVDQDQGEYNTWGQGTITVTVSS</p> <p>sLAG3 CDR1 variable heavy chain</p> <p>GYTVSSYCMG</p> <p>sLAG3 CDR2 variable heavy chain</p> <p>AIDSDGSVSYADSVKG</p> <p>sLAG3 CDR3 variable heavy chain</p> <p>DLCWVDQDQGEYNT</p> |
| W-3669      | LAG-3×PD-L1 | <p>Anti-PDL1 VHH</p> <p>EVQLVESGGGLVQPGGSLRLSCAASGHFSNLAVNWFRQAPGKERELVAGILWSGGSTFYADSVKGR<br/> FTISRGNAENMLYLQMNSLRAEDTAVYYCNTGTNWGQGTITVTVSS</p> <p>CDR1 Anti-PDL1 VHH</p> <p>GHFSNLAVN</p> <p>CDR2 Anti-PDL1 VHH</p> <p>GILWSGGSTFYADSVKG</p> <p>CDR3 Anti-PDL1 VHH</p> <p>GTN</p> <p>Anti-LAG3 VHH</p> <p>QVQLVESGGGVVQPGGSLRLSCAASGLTSLQYTMGWFRQAPGKERELVAIIHWTSSVTDYADSVY<br/> GRFTISRDDSKNTGYLQMNSLRAEDTAVYYCAATHYYTHRGPFDYWGQGTITVTVSS</p> <p>CDR1 Anti-LAG3 VHH</p> <p>GLTSLQYTMG</p> <p>CDR2 Anti-LAG3 VHH</p> <p>AIHWTSSVTDYADSVY</p> <p>CDR3 Anti-LAG3 VHH</p> <p>THYYTHRGPF</p>                                                                                                                                                                                                                                                                                                        |
| hz7F10-hzB6 | LAG-3×PD-L1 | <p>Heavy chain</p> <p>EVQLVQSGAEVKKPGASVKVSCASGVNIKDDYMHWVRQAPGQGLEWIGRIDPEDVETKYDPKFQ<br/> GRVTITADTSTSTAYMELSSLRSEDTAVYYCARSFYSNYVNYFDQWGQGTITVTVSSASTKGPSVFPL<br/> APSSKSTSGGTAALGCLVKDYFPEPVTVSWNSGALTSGVHTFPAVLQSSGLYSLSSVTVTPSSSLGTQ<br/> TYICNVNHKPSNTKVDKKVEPKSCDKTHTCPPCPAPEAAGGPSVFLFPPKPKDTLMISRTPEVTCVVV<br/> DVSHEDPEVKFNWYVDGVEVHNAKTKPREEQYNSTYRVVSVLTVLHQDWLNGKEYKCKVSNKAL<br/> PAPIEKTISKAKGQPREPQVYTLPPSRDELTKNQVSLTCLVKGFYPSDIAVEWESNGQPENNYKTTTPV<br/> LDSDGSFFLYSKLTVDKSRWQQGNVFSCSVMEALHNHYTQKSLSLSPGGGGSPGGGSPGGGSEV<br/> QLVESGGGLVQPGGSLRLSCAASEYIGDRYCAGWFRQAPGKEREGVAMIDRHGIVRYKDSVEGRFTI</p>                                                                                                                                                                                                                                                                            |

|  |  |                                                                                                                                                                                                                                                                                                                                                                                                                                                                                                                                                                                                                                                                                                                                                                                                                                                                                                                                                                                                                                                                                                                                                                                                                                                                                                                                                                                                                                                                                                                                                                                                                                                                                                                                                                                                                                                                                                                                                                                                                                                                                                                                                                                                                                                                                                                                                                                              |
|--|--|----------------------------------------------------------------------------------------------------------------------------------------------------------------------------------------------------------------------------------------------------------------------------------------------------------------------------------------------------------------------------------------------------------------------------------------------------------------------------------------------------------------------------------------------------------------------------------------------------------------------------------------------------------------------------------------------------------------------------------------------------------------------------------------------------------------------------------------------------------------------------------------------------------------------------------------------------------------------------------------------------------------------------------------------------------------------------------------------------------------------------------------------------------------------------------------------------------------------------------------------------------------------------------------------------------------------------------------------------------------------------------------------------------------------------------------------------------------------------------------------------------------------------------------------------------------------------------------------------------------------------------------------------------------------------------------------------------------------------------------------------------------------------------------------------------------------------------------------------------------------------------------------------------------------------------------------------------------------------------------------------------------------------------------------------------------------------------------------------------------------------------------------------------------------------------------------------------------------------------------------------------------------------------------------------------------------------------------------------------------------------------------------|
|  |  | <p>SRNHAGNTLYLQMNSLRAEDTAVYYCAADRPTNVIPCRPEYPMMDYWGQGLTVTVSS</p> <p>Heavy chain</p> <p>EVQLVQSGAEVKKPGASVKVSCKASGVNIKDDYMHWVRQAPGQGLEWIGRIDPEDVETKYDPKFQ</p> <p>GRVTITADTSTSTAYMELSSLRSED TAVYYCARSFYSNVNYFDQWGQGLTVTVSSASTKGPSVFPL</p> <p>APSSKSTSGGTAALGCLVKDYFPEPTVSWNSGALTSGVHTFPAVLQSSGLYSLSSVTVPSSSLGTQ</p> <p>TYICNVNHKPSNTKVDKKVEPKSCDKTHTCPPCPAPEAAGGPSVFLFPPKPKDTLMISRTPEVTCVTV</p> <p>DVSHEDPEVKFNWYVDGVEVHNAKTKPREEQYNSTYRVVSVLTVLHQDWLNGKEYKCKVSNKAL</p> <p>PAPIEKTISKAKGQPREPQVYTLPPSRDELTKNQVSLTCLVKGFYPSDIAVEWESNGQPENNYKTTPPV</p> <p>LDSGGSFFLYSKLTVDKSRWQQGNVFSCSVMHEALHNHYTQKSLSLSPGSGGSGGGSPGGGSEV</p> <p>QLVESGGGLVQPGGSLRLSCAASRDSDEGASCMGWFRQAPGKEREGVAIFNAGERTDYGDSVKGR</p> <p>FTISRDNANTLYLQMNSLRAEDTAVYYCATVWCGSWVARSWGQGLTVTVSS</p> <p>Linker</p> <p>GGGGSPGGGSPGGGS</p> <p>Variable heavy chain (Anti-PD-L1)</p> <p>EVQLVESGGGLVQPGGSLRLSCAASEYIGDRYCAGWFRQAPGKEREGVAMIDRHGIVRYKDSVEGR</p> <p>FTISRNHAGNTLYLQMNSLRAEDTAVYYCAADRPTNVIPCRPEYPMMDYWGQGLTVTVSS</p> <p>CDR1 variable heavy chain (Anti-PD-L1)</p> <p>EYIGDRYCAG</p> <p>CDR2 variable heavy chain (Anti-PD-L1)</p> <p>MIDRHGIV</p> <p>CDR3 variable heavy chain (Anti-PD-L1)</p> <p>DRDPTNVIPCRPEYPMMDY</p> <p>Constant heavy chain (Anti-LAG3)</p> <p>ASTKGPSVFPLAPSSKSTSGGTAALGCLVKDYFPEPTVSWNSGALTSGVHTFPAVLQSSGLYSLSSV</p> <p>VTVPSSSLGTQTYICNVNHKPSNTKVDKKVEPKSCDKTHTCPPCPAPEAAGGPSVFLFPPKPKDTLMI</p> <p>SRTPEVTCVTVVDVSHEDPEVKFNWYVDGVEVHNAKTKPREEQYNSTYRVVSVLTVLHQDWLNGKE</p> <p>YKCKVSNKALPAPIEKTISKAKGQPREPQVYTLPPSRDELTKNQVSLTCLVKGFYPSDIAVEWESNGQ</p> <p>PENNYKTTPVLDSGGSFFLYSKLTVDKSRWQQGNVFSCSVMHEALHNHYTQKSLSLSPG</p> <p>Constant light chain (Anti-LAG3)</p> <p>RTVAAPSVFIFPPSDEQLKSGTASVVCLLNFPYPREAKVQWKVDNALQSGNSQESVTEQDSKDSTYS</p> <p>LSSTLTLSKADYEKHKVYACEVTHQGLSSPVTKSFNRGEC</p> <p>Variable heavy chain (Anti-LAG3)</p> <p>EVQLVQSGAEVKKPGASVKVSCKASGVNIKDDYMHWVRQAPGQGLEWIGRIDPEDVETKYDPKFQ</p> <p>GRVTITADTSTSTAYMELSSLRSED TAVYYCARSFYSNVNYFDQWGQGLTVTVSS</p> <p>Variable light chain (Anti-LAG3)</p> <p>DIQMTQSPSSLSASVGDRTITCKASENVGTYSVWFQKPKGAPKLLIYGASNRYTGVPSTRFSGSGSG</p> <p>TDFTLTISLQPEDFATYYCGQSYSPYTFGQGTKLEIK</p> <p>CDR1 variable heavy chain (Anti-LAG3)</p> <p>DDYMH</p> <p>CDR2 variable heavy chain (Anti-LAG3)</p> <p>RIDPEDVETKYDPKFQ</p> <p>CDR3 variable heavy chain (Anti-LAG3)</p> <p>SFYSNVNYFDQWGQ</p> <p>CDR1 variable light chain (Anti-LAG3)</p> |
|--|--|----------------------------------------------------------------------------------------------------------------------------------------------------------------------------------------------------------------------------------------------------------------------------------------------------------------------------------------------------------------------------------------------------------------------------------------------------------------------------------------------------------------------------------------------------------------------------------------------------------------------------------------------------------------------------------------------------------------------------------------------------------------------------------------------------------------------------------------------------------------------------------------------------------------------------------------------------------------------------------------------------------------------------------------------------------------------------------------------------------------------------------------------------------------------------------------------------------------------------------------------------------------------------------------------------------------------------------------------------------------------------------------------------------------------------------------------------------------------------------------------------------------------------------------------------------------------------------------------------------------------------------------------------------------------------------------------------------------------------------------------------------------------------------------------------------------------------------------------------------------------------------------------------------------------------------------------------------------------------------------------------------------------------------------------------------------------------------------------------------------------------------------------------------------------------------------------------------------------------------------------------------------------------------------------------------------------------------------------------------------------------------------------|

|                      |             |                                                                                                                                                                                                                                                                                                                                                                                                                                                                                                                                                                                                                                                                                                                                                                                                                                                                                                                                                                                                                                                                                                                                                                                                                                                                                                                                                                                                                                       |
|----------------------|-------------|---------------------------------------------------------------------------------------------------------------------------------------------------------------------------------------------------------------------------------------------------------------------------------------------------------------------------------------------------------------------------------------------------------------------------------------------------------------------------------------------------------------------------------------------------------------------------------------------------------------------------------------------------------------------------------------------------------------------------------------------------------------------------------------------------------------------------------------------------------------------------------------------------------------------------------------------------------------------------------------------------------------------------------------------------------------------------------------------------------------------------------------------------------------------------------------------------------------------------------------------------------------------------------------------------------------------------------------------------------------------------------------------------------------------------------------|
|                      |             | <p>KASENVGTYVS</p> <p>CDR2 variable light chain (Anti-LAG3)</p> <p>GASNRYT</p> <p>CDR3 variable light chain (Anti-LAG3)</p> <p>GQSYSYPYT</p>                                                                                                                                                                                                                                                                                                                                                                                                                                                                                                                                                                                                                                                                                                                                                                                                                                                                                                                                                                                                                                                                                                                                                                                                                                                                                          |
| PB-68                | LAG-3×PD-L1 | <p>Variable heavy chain region (Anti-LAG-3)</p> <p>QVQLVQSGGGVVPGRSLRLSCAASGFTFSYDTHWVRQAPGKGLEWVAVISYDGSNKYYADSVK</p> <p>GRFTISRDN SKNTLYLHMNSLRAEDTAMYYCARERGWDFDIWGQGTITVTVSS</p> <p>Constant heavy chain region-1 (Anti-LAG-3)</p> <p>ASTKGPSVFPLAPSSKSTSGGTAALGCLVKDYFPEPVTWNSGALTSVHTFPAVLQSSGLYSLSSV</p> <p>VTVPSSSLGTQTYICNVNHKPSNTKVDKRV</p> <p>Constant heavy chain region-2 (Anti-LAG-3)</p> <p>APELGRGPSVFLFPPKPKDTLMISRTPEVTCVVVDVSHEDPEVKFNWYVDGVEVHNAKTKPREEQYN</p> <p>STYRVVSVLTVLHQDWLNGKEYKCKVSNKALPAPIEKTISKAK</p> <p>Constant heavy chain region-3 (Anti-LAG-3)</p> <p>GQPREPQVYTKPPSREEMTKNQVSLKCLVKGFYPSDIAVEWESNGQPENNYKTPPVLDSDGSFFLY</p> <p>SKLTVDKSRWQQGNVFCFSVMHEALHNHYTQKSLSLSPGK</p> <p>Constant heavy chain region-1 (Anti-PD-L1)</p> <p>ASTKGPSVFPLAPSSKSTSGGTAALGCLVKDYFPEPVTWNSGALTSVHTFPAVLQSSGLYSLSSV</p> <p>VTVPSSSLGTQTYICNVNHKPSNTKVDKRV</p> <p>Constant heavy chain region-2 (Anti-PD-L1)</p> <p>APELGRGPSVFLFPPKPKDTLMISRTPEVTCVVVDVSHEDPEVKFNWYVDGVEVHNAKTKPREEQYN</p> <p>STYRVVSVLTVLHQDWLNGKEYKCKVSNKALPAPIEKTISKAK</p> <p>Constant heavy chain region-3 (Anti-PD-L1)</p> <p>GQPREPQVYTDPPSREEMTKNQVSLTCEVKGFYPSDIAVEWESNGQPENNYKTPPVLDSDGSFFLYS</p> <p>KLTVDKSRWQQGNVFCFSVMHEALHNHYTQKSLSLSPGK</p> <p>Variable heavy chain region (Anti-PD-L1)</p> <p>EVQLVQSGAEVKKPGSSVKVSCASGGTFTSYAISWVRQAPGQGLEWMGWIIPTDGNIAQKFQG</p> <p>RVTITADKSTSTAYMELTSLRSEDTAVYYCARHDYTNTVDAFDIWGQGTMTVTVSS</p> |
| Hanmi bsAb           | PD-1×PD-L1  | NA                                                                                                                                                                                                                                                                                                                                                                                                                                                                                                                                                                                                                                                                                                                                                                                                                                                                                                                                                                                                                                                                                                                                                                                                                                                                                                                                                                                                                                    |
| LY-3434172           | PD-1×PD-L1  | NA                                                                                                                                                                                                                                                                                                                                                                                                                                                                                                                                                                                                                                                                                                                                                                                                                                                                                                                                                                                                                                                                                                                                                                                                                                                                                                                                                                                                                                    |
| anti-PD-1×PD-L1 BsAb | PD-1×PD-L1  | NA                                                                                                                                                                                                                                                                                                                                                                                                                                                                                                                                                                                                                                                                                                                                                                                                                                                                                                                                                                                                                                                                                                                                                                                                                                                                                                                                                                                                                                    |
| 609-Fab-PD-L1-IgG4   | PD-1×PD-L1  | NA                                                                                                                                                                                                                                                                                                                                                                                                                                                                                                                                                                                                                                                                                                                                                                                                                                                                                                                                                                                                                                                                                                                                                                                                                                                                                                                                                                                                                                    |
| IMGS-001             | PD-L2×PD-L1 | NA                                                                                                                                                                                                                                                                                                                                                                                                                                                                                                                                                                                                                                                                                                                                                                                                                                                                                                                                                                                                                                                                                                                                                                                                                                                                                                                                                                                                                                    |
| Bi-201               | PD-L2×PD-L1 | <p>QVQLVESGGGLVPGGSLRLSCAASGHTFIIYAIGWFRQAPGKGLEFVATINWSGSMTNYADSVKGR</p> <p>FTISRDN AKNTVY LQMNSLKPDDTAVYYCAAYVGATISTAHSRYDYWGQGTITVTVSSDKTHTCPPC</p> <p>PAPEAAGGPSVFLFPPKPKDTLMISRTPEVTCVVVDVSHEDPEVKFNWYVDGVEVHNAKTKPREEQY</p> <p>NSTYRVVSVLTVLHQDWLNGKEYKCKVSNKALPAPIEKTISKAKGQPREPQVYTLPPSREEMTKNQV</p> <p>SLTCLVKGFYPSDIAVEWESNGQPENNYKTPPVLDSDGSFFLYSKLTVDKSRWQQGNVFCFSVMHE</p> <p>ALHNHYTQKSLSLSPGGGGGSGGGGSGGGGSGGGGSGEVQLVESGGGLVPGGSLRLSCAASGRFT</p> <p>SSMTIGWFRQAPGKGLEFVSGIGWTSGLTVYADSVKGRFTISRDN AKNSMYLQMNSLRAEDTAVYY</p> <p>CAADSMNRGQFDYWGQGTITVTVSS</p>                                                                                                                                                                                                                                                                                                                                                                                                                                                                                                                                                                                                                                                                                                                                                                                                                                                           |

|            |             |                                                                                                                                                                                                                                                                                                                                                                                                                                                                                                                                                                                                                                                                                                                                                                                                                                                                                                                                                                                                                                                                                                                                                                                                                                                                                                                                                                                                                                                                                                                                                                                                                                                                                                                                                                                                                                                                                                                                                                                                                                                                                                                                                                                                                                                                                                                      |
|------------|-------------|----------------------------------------------------------------------------------------------------------------------------------------------------------------------------------------------------------------------------------------------------------------------------------------------------------------------------------------------------------------------------------------------------------------------------------------------------------------------------------------------------------------------------------------------------------------------------------------------------------------------------------------------------------------------------------------------------------------------------------------------------------------------------------------------------------------------------------------------------------------------------------------------------------------------------------------------------------------------------------------------------------------------------------------------------------------------------------------------------------------------------------------------------------------------------------------------------------------------------------------------------------------------------------------------------------------------------------------------------------------------------------------------------------------------------------------------------------------------------------------------------------------------------------------------------------------------------------------------------------------------------------------------------------------------------------------------------------------------------------------------------------------------------------------------------------------------------------------------------------------------------------------------------------------------------------------------------------------------------------------------------------------------------------------------------------------------------------------------------------------------------------------------------------------------------------------------------------------------------------------------------------------------------------------------------------------------|
| LY-3415244 | TIM-3×PD-L1 | <p>Anti-PD-L1 Heavy chain</p> <p>QVQLVQSGAEVKKPGSSVKVSCKASGGTFSSYAISWVRQAPQGQLEWMGGIIPFGTANYAQKFQGR<br/>VTITADKSTSTAYMELSSLRSEDTAVYYCARSPDYSPYYYYGMDVWGQGTTVTVSSASTKGPSVFPL<br/>APSSKSTSGGTAALGCLVKDYFPEPVTVSWNSGALTSGVHTFPAVLQSSGLYSLKSVVTVPSSSLGTQ<br/>TYICNVNHKPSNTKVDKRVEPKSCDKTHTCPPCPAPEAAGGPSVFLFPPKPKDTLMISRTPEVTCVTVV<br/>SVSHEDPEVKFNWYVDGVEVHNAKTKPREEQYNSTYRVVSVLTVLHQDWLNGKEYCKCKVSNKALP<br/>APIEKTISKAKGQPREPQVYVLPSPRDELTKNQVSLTCLVKGFYPSDIAVEWESNGQPENNYLTWPPV<br/>LDSGGSFFLYSKLTVDKSRWQQGNVFSCSVMEALHNHYTQKSLSLSPGK</p> <p>Anti-TIM3 Heavy chain</p> <p>EVQLLESGGGLVQPGGSLRLSCAASGFTFSSYYMSWVRQAPGKGLEWVSAISGNGKSTYYADSVKG<br/>RFTISRDN SKNTLYLQMNSLRAEDTAVYYCARYYNTGFDLWGQGLTVTVSSASTKGPSVFPEAPSSK<br/>STSGGTAALGCLVTDYFPEPVTVSWNSGALTSGVHTFPAVLESSGLYSLVSVTVPSSSLGTQTYICN<br/>VNHKPSNTKVDKRVEPKSCDKTHTCPPCPAPEAAGGPSVFLFPPKPKDTLMISRTPEVTCVTVVSVSHE<br/>DPEVKFNWYVDGVEVHNAKTKPREEQYNSTYRVVSVLTVLHQDWLNGKEYCKCKVSNKALPAPIEK<br/>TISKAKGQPREPQVYVLPSPRDELTKNQVSLTCLVKGFYPSDIAVEWESNGQPENNYKTTTPVLDS<br/>GSFALVSKLTVDKSRWQQGNVFSCSVMEALHNHYTQKSLSLSPGK</p> <p>Anti-PD-L1 Light chain</p> <p>QSVLTQPPSASGTPGQRTVISCSSGSSNIGSNTVNWYQQLPGTAPKLLIYGNSNRPSGVPDRFSGSKSG<br/>TSASLAISGLQSEDEADYYCQSYDSSLGSGVFSGGKIKLTVLGQPKAAPSVTLFPPSSEELQANKATLV<br/>LISDFYPGAVTVAWKADSSPVKAGVETTTTPSKQSNKYAAESELSTPEQWKSRSYSCQVTHEGST<br/>VEKTVAPAECS</p> <p>Anti-TIM3 Light chain</p> <p>DIVMTQSPSSLSASVGDGVITTCQASQDIYNLWYQKPKGAPKLLIYYASSIVSGVPSRFSGSGSGT<br/>DFTLTISSLQPEDFATYYCQQAASSFPPTFGQGTKLEIKRTVAAPSVFIFPPSDEQLKSGTARVGCCLN<br/>NFPYBREAKVQWKVDNALQSGNSQESVTEQDSKSTYSLRSALTLSKADYEKHKVYACEVTHQGLSSPV<br/>TKSFNRGEC</p> <p>Anti-PD-L1 Variable heavy chain</p> <p>QVQLVQSGAEVKKPGSSVKVSCKASGGTFSSYAISWVRQAPQGQLEWMGGIIPFGTANYAQKFQGR<br/>VTITADKSTSTAYMELSSLRSEDTAVYYCARSPDYSPYYYYGMDVWGQGTTVTVSS</p> <p>Anti-TIM3 Variable heavy chain</p> <p>EVQLLESGGGLVQPGGSLRLSCAASGFTFSSYYMSWVRQAPGKGLEWVSAISGNGKSTYYADSVKG<br/>RFTISRDN SKNTLYLQMNSLRAEDTAVYYCARYYNTGFDLWGQGLTVTVSS</p> <p>Anti-PD-L1 Variable light chain</p> <p>QSVLTQPPSASGTPGQRTVISCSSGSSNIGSNTVNWYQQLPGTAPKLLIYGNSNRPSGVPDRFSGSKSG<br/>TSASLAISGLQSEDEADYYCQSYDSSLGSGVFSGGKIKLTVLG</p> <p>Anti-TIM3 Variable light chain</p> <p>DIVMTQSPSSLSASVGDGVITTCQASQDIYNLWYQKPKGAPKLLIYYASSIVSGVPSRFSGSGSGT<br/>DFTLTISSLQPEDFATYYCQQAASSFPPTFGQGTKLEIK</p> |
| BTP-21     | TIGIT×PD-L1 | <p>AS19584VH28 sdAb-Fc (IgG4)</p> <p>EVQLVESGGGLVQPGGSLRLSCAASGYKYGVYSMGWFRQAPGKLEGVSAICSGGRRTTYSVSKGR<br/>FTISRDN SKNTLYLQMNSLRAEDTAVYYCAARPLWTGDCDLSSSWYKTWGQGLTVTVSSSESKYGP<br/>P<br/>CPPCPAPEFLGGPSVFLFPPKPKDTLMISRTPEVTCVTVVDVSDQEDPEVQFNWYVDGVEVHNAKTKP<br/>R<br/>EEQFNSTYRVVSVLTVLHQDWLNGKEYCKCKVSNKGLPSSIEKTISKAKGQPREPQVYTLPPSQEEMT<br/>KNQVSLTCLVKGFYPSDIAVEWESNGQPENNYKTTTPVLDSGGSFFLYSRLTVDKSRWQEGNVFSCS</p>                                                                                                                                                                                                                                                                                                                                                                                                                                                                                                                                                                                                                                                                                                                                                                                                                                                                                                                                                                                                                                                                                                                                                                                                                                                                                                                                                                                                                                                                                                                                                                                                                                                                                                                                                                                                                                                                                             |

|                     |             |                                                                                                                                                                                                                                                                                                                                                                                                                                                                                                                                                                                                                                                                                                                                                                                                                                                                                                                                                                                                                                                                                                                                                                                                                                                                                                                                                                                                                                                                                                                                                                                                                                                                                                                                                                                                                                                                                                                                                                                   |
|---------------------|-------------|-----------------------------------------------------------------------------------------------------------------------------------------------------------------------------------------------------------------------------------------------------------------------------------------------------------------------------------------------------------------------------------------------------------------------------------------------------------------------------------------------------------------------------------------------------------------------------------------------------------------------------------------------------------------------------------------------------------------------------------------------------------------------------------------------------------------------------------------------------------------------------------------------------------------------------------------------------------------------------------------------------------------------------------------------------------------------------------------------------------------------------------------------------------------------------------------------------------------------------------------------------------------------------------------------------------------------------------------------------------------------------------------------------------------------------------------------------------------------------------------------------------------------------------------------------------------------------------------------------------------------------------------------------------------------------------------------------------------------------------------------------------------------------------------------------------------------------------------------------------------------------------------------------------------------------------------------------------------------------------|
|                     |             | <p>VMHEALHNHYTQKSLSLGLK</p> <p>IgG1 hinge region</p> <p>EPKSCDKTHTCPPCP</p>                                                                                                                                                                                                                                                                                                                                                                                                                                                                                                                                                                                                                                                                                                                                                                                                                                                                                                                                                                                                                                                                                                                                                                                                                                                                                                                                                                                                                                                                                                                                                                                                                                                                                                                                                                                                                                                                                                       |
| HLX-301             | TIGIT×PD-L1 | NA                                                                                                                                                                                                                                                                                                                                                                                                                                                                                                                                                                                                                                                                                                                                                                                                                                                                                                                                                                                                                                                                                                                                                                                                                                                                                                                                                                                                                                                                                                                                                                                                                                                                                                                                                                                                                                                                                                                                                                                |
| HB-0036             | TIGIT×PD-L1 | NA                                                                                                                                                                                                                                                                                                                                                                                                                                                                                                                                                                                                                                                                                                                                                                                                                                                                                                                                                                                                                                                                                                                                                                                                                                                                                                                                                                                                                                                                                                                                                                                                                                                                                                                                                                                                                                                                                                                                                                                |
| TIGIT-Fc-93-V<br>H6 | TIGIT×PD-L1 | <p>Heavy chain</p> <p>EVKLVESGGGLVQPGGSLRLSCAASGFTFSDYMYWVRQAPGKRLEWVASITKGGGSTYYPTLKG<br/>RFTISRDNNAKNSLYLQMNRLRAEDTAVYYCARQSSYDFVMDYWGQGTITVTVSSASTKGPSVFPLAP<br/>SSKSTSGGTAALGCLVKDYFPEPVTVSWNSGALTSGVHTFPAVLQSSGLYSLSSVTVTPSSSLGTQTY<br/>ICNVNHKPSNTKVDKKVEPKSCDKTHTCPPCPAPPELLGGPSVFLFPPKPKDTLMISRTPEVTCVVDV<br/>SHEDPEVKFNWYVDGVEVHNAKTKPREEQYNSTYRVVSVLTVLHQDWLNGKEYKCKVSNKALPAP<br/>IEKTIKAKGQPREPQVYTLPPSREEMTKNQVSLTCLVKGFYPSDIAVEWESNGQPENNYKTTTPVLD<br/>SDGSFFLYSKLTVDKSRWQQGNVFCSCVMHEALHNHYTQKSLSLSPGKGGGGSGGGSGGGSGG<br/>GGSEVQLVESGGGLVQPGGSLRLSCAASGFTFTFRHYVMGWFRQAPGKEREFVAAISWSGSGSYA<br/>DSVKGRFTISRDNKNTVYLQMNSLRAEDTAVYYCAADMTRMSQASREYDYWGQGLTVTVSS</p> <p>Light chain</p> <p>DIVMTQSPSSLSASVGDRVTITCKASQDQDVTAVAWYQQKPGKAPKLLIYWASARHTGVPSRFSGSGS<br/>GTDFTFTISSLQPEDATYYCQYSNYPLTFGQGTGLEIKRTVAAPSVFIFPPSDEQLKSGTASVCLLN<br/>NFYPREAKVQWKVDNALQSGNSQESVTEQDSKSTYLSSTLTLSKADYEKHKVYACEVTHQGLSS<br/>PVTCSFNRGEC</p> <p>Variable heavy chain (Anti-TIGIT)</p> <p>EVKLVESGGGLVQPGGSLRLSCAASGFTFSDYMYWVRQAPGKRLEWVASITKGGGSTYYPTLKG<br/>RFTISRDNNAKNSLYLQMNRLRAEDTAVYYCARQSSYDFVMDYWGQGTITVTVSS</p> <p>Variable light chain (Anti-TIGIT)</p> <p>DIVMTQSPSSLSASVGDRVTITCKASQDQDVTAVAWYQQKPGKAPKLLIYWASARHTGVPSRFSGSGS<br/>GTDFTFTISSLQPEDATYYCQYSNYPLTFGQGTGLEIK</p> <p>CDR1 variable heavy chain (Anti-TIGIT)</p> <p>DYYMY</p> <p>CDR2 variable heavy chain (Anti-TIGIT)</p> <p>SITKGGGSTYYPTLKG</p> <p>CDR3 variable heavy chain (Anti-TIGIT)</p> <p>QSSYDFVMDY</p> <p>CDR1 variable light chain (Anti-TIGIT)</p> <p>KASQDQDVTAVA</p> <p>CDR2 variable light chain (Anti-TIGIT)</p> <p>WASARHT</p> <p>CDR3 variable light chain (Anti-TIGIT)</p> <p>QYSNYPLT</p> <p>Variable heavy chain (Anti-PD-L1)</p> <p>EVQLVESGGGLVQPGGSLRLSCAASGFTFTFRHYVMGWFRQAPGKEREFVAAISWSGSGSYADSV<br/>KGRFTISRDNKNTVYLQMNSLRAEDTAVYYCAADMTRMSQASREYDYWGQGLTVTVSS</p> <p>CDR1 variable heavy chain (Anti-PD-L1)</p> <p>RHYVMG</p> <p>CDR2 variable heavy chain (Anti-PD-L1)</p> |



|       |             |                                                                                                                                                                                                                                                                                                                                                                                                                                                                                                                                                                                                                                                                                                                                                                                                                                                                                                                                                                                                                                                                                                                                                                                                                                                                                                                                                                                                                                                                                                                                                                                                                                                                                                                                                                                                                                                                                                                                                                                                                                                                                                                                                                                                                                                                                                                                                                                                                                                                                                                                                                                    |
|-------|-------------|------------------------------------------------------------------------------------------------------------------------------------------------------------------------------------------------------------------------------------------------------------------------------------------------------------------------------------------------------------------------------------------------------------------------------------------------------------------------------------------------------------------------------------------------------------------------------------------------------------------------------------------------------------------------------------------------------------------------------------------------------------------------------------------------------------------------------------------------------------------------------------------------------------------------------------------------------------------------------------------------------------------------------------------------------------------------------------------------------------------------------------------------------------------------------------------------------------------------------------------------------------------------------------------------------------------------------------------------------------------------------------------------------------------------------------------------------------------------------------------------------------------------------------------------------------------------------------------------------------------------------------------------------------------------------------------------------------------------------------------------------------------------------------------------------------------------------------------------------------------------------------------------------------------------------------------------------------------------------------------------------------------------------------------------------------------------------------------------------------------------------------------------------------------------------------------------------------------------------------------------------------------------------------------------------------------------------------------------------------------------------------------------------------------------------------------------------------------------------------------------------------------------------------------------------------------------------------|
|       |             | <p>AISWSGSGSYADSVKG</p> <p>CDR3 variable heavy chain (Anti-PD-L1)</p> <p>DMTTRMSQASREYDY</p>                                                                                                                                                                                                                                                                                                                                                                                                                                                                                                                                                                                                                                                                                                                                                                                                                                                                                                                                                                                                                                                                                                                                                                                                                                                                                                                                                                                                                                                                                                                                                                                                                                                                                                                                                                                                                                                                                                                                                                                                                                                                                                                                                                                                                                                                                                                                                                                                                                                                                       |
| P-O-T | TIGIT×PD-L1 | <p>Heavy chain (Anti-PDL1 and Anti-TIGIT)</p> <p>QVQLVQSGAEVKKPGASVKVSCKASGYTFTSYWMHWVRQAPGQGLEWMGRITPSSGFAMYNEKF<br/> KNRVTMTRDTSTSTVYMELSSLRSEDTAVYYCARGGSSYDYFDYWGQGTITVTVSSGGGGSSGAPRF<br/> LTRPKAFVVSVGKDATLSSQIVGNPFPQVSWEKDKQPVTAGVRFRLAQDGDLYRLKILDQLSDSGQ<br/> YVSRARNAIGEAFACLGQVDAEAGGGGSEVQLVQSGAEVKKPGASVKVSCKASGYTFTNYWMH<br/> WVRQAPGQGLEWMGRIDPDSTGSKYNEKFKTRVTMTRDTSTSTVYMELSSLRSEDTAVYYCAREG<br/> AYGYFDYWGQGTITVTVSSASTKGPSVFPLAPSSKSTSGGTAALGCLVKDYFPEPVTVSWNSGALTS<br/> GVHTFPAVLQSSGLYSLSSVTVPSSSLGTQTYICNVNHKPSNTKVDKKVEPKSCDKTHTCPPCPAPE<br/> LLGGPSVFLFPPKPKDTLMISRTPEVTCVVDVSHEDPEVKFNWYVDGVEVHNAKTKPREEQYNSTY<br/> RVVSVLTVLHQDWLNGKEYKCKVSNKALPAPIEKTISKAKGQPREPQVYTLPPSRDELTKNQVSLTC<br/> LVKGFYPSDIAVEWESNGQPENNYKTPPVLDSDGSFFLYSKLTVDKSRWQQGNVFSCSVMHEALH<br/> NHYTQKSLSLSPGK</p> <p>Light chain 1 (Anti-PDL1 and Anti-TIGIT)</p> <p>DIVLTQSPASLAVSPGQRATITCRASESVSIHGTHLMHWYQQKPGQPPLLIYAASKLESGVPARFSGS<br/> GSGTDFTLTINPVEAEDTANYYCQQSFEDPLTFGQGTKLEIKGGGSGIPPKIECLPIDISIDEGKVLTV<br/> ASAFTGEPTPEVTWSTGGRKIHSQEQRFHIENTDDLTTLLIKDVQKQDGGLYTLTLRNEFGSDSATV<br/> NIHIRSI</p> <p>Light chain 2 (Anti-PDL1 and Anti-TIGIT)</p> <p>DIQMTQSPSSLSASVGDRVITTCRASENIYSYLAWYQQKPGKSPKLLIYNARTLAEGVPSRFSGSGSGT<br/> DFTLTISSLQPEDFATYYCQYHSGSPLPFGGGTKVEIKRTVAAPSVFIFPPSDEQLKSGTASVVCLLNPF<br/> YPREAKVQWKVDNALQSGNSQESVTEQDSKDYSLSTLTLSKADYEKHKVYACEVTHQGLSSPV<br/> TKSFNRGEC</p> <p>Heavy chain (Anti-TIGIT)</p> <p>EVQLVQSGAEVKKPGASVKVSCKASGYTFTNYWMHWVRQAPGQGLEWMGRIDPDSTGSKYNEKF<br/> KTRVTMTRDTSTSTVYMELSSLRSEDTAVYYCAREGAYGYFDYWGQGTITVTVSSASTKGPSVFPL<br/> APSSKSTSGGTAALGCLVKDYFPEPVTVSWNSGALTSGVHTFPAVLQSSGLYSLSSVTVPSSSLGTQ<br/> TYICNVNHKPSNTKVDKKVEPKSCDKTHTCPPCPAPELLGGPSVFLFPPKPKDTLMISRTPEVTCVVV<br/> DVSHEDPEVKFNWYVDGVEVHNAKTKPREEQYNSTYRVVSVLTVLHQDWLNGKEYKCKVSNKAL<br/> PAPIEKTISKAKGQPREPQVYTLPPSRDELTKNQVSLTCLVKGFYPSDIAVEWESNGQPENNYKTPPV<br/> LDSDGSFFLYSKLTVDKSRWQQGNVFSCSVMHEALHNHYTQKSLSLSPGK</p> <p>Light chain (Anti-TIGIT)</p> <p>DIQMTQSPSSLSASVGDRVITTCRASENIYSYLAWYQQKPGKSPKLLIYNARTLAEGVPSRFSGSGSGT<br/> DFTLTISSLQPEDFATYYCQYHSGSPLPFGGGTKVEIKRTVAAPSVFIFPPSDEQLKSGTASVVCLLNPF<br/> YPREAKVQWKVDNALQSGNSQESVTEQDSKDYSLSTLTLSKADYEKHKVYACEVTHQGLSSPV<br/> TKSFNRGEC</p> <p>Variable heavy chain (Anti-TIGIT)</p> <p>EVQLVQSGAEVKKPGASVKVSCKASGYTFTNYWMHWVRQAPGQGLEWMGRIDPDSTGSKYNEKF<br/> KTRVTMTRDTSTSTVYMELSSLRSEDTAVYYCAREGAYGYFDYWGQGTITVTVSS</p> <p>Variable light chain (Anti-TIGIT)</p> <p>DIQMTQSPSSLSASVGDRVITTCRASENIYSYLAWYQQKPGKSPKLLIYNARTLAEGVPSRFSGSGSGT<br/> DFTLTISSLQPEDFATYYCQYHSGSPLPFGGGTKVEIK</p> |

|                         |             |                                                                                                                                                                                                                                                                                                                                                                                                                                                                                                                                                                                                                                                                                                                                                                                                                                                                                                                                                                                                                                                                                                                                                                                  |
|-------------------------|-------------|----------------------------------------------------------------------------------------------------------------------------------------------------------------------------------------------------------------------------------------------------------------------------------------------------------------------------------------------------------------------------------------------------------------------------------------------------------------------------------------------------------------------------------------------------------------------------------------------------------------------------------------------------------------------------------------------------------------------------------------------------------------------------------------------------------------------------------------------------------------------------------------------------------------------------------------------------------------------------------------------------------------------------------------------------------------------------------------------------------------------------------------------------------------------------------|
|                         |             | <p>Heavy chain (Anti-PDL1)</p> <p>QVQLVQSGAEVKKPGASVKVSCKASGYTFTSYWMHWVRQAPGQGLEWMGRITPSSGFAMYNEKF<br/> KNRVTMTRDTSTSTVYMELSSLRSEDNAVYYCARGGSSYDYFDYWGQGTITVTVSSASTKGPSVFPL<br/> APSSKSTSGGTAALGCLVKDYFPEPVTVSWNSGALTSGVHTFPAVLQSSGLYSLSSVTVTPSSSLGTQ<br/> TYICNVNHKPSNTKVDKKVEPKSCDKTHTCPPCPAPELLGGPSVFLFPPKPKDTLMISRTPEVTCVTVV<br/> DVSHEDPEVKFNWYVDGVEVHNAKTKPREEQYNSTYRVVSVLTVLHQDWLNGKEYKCKVSNKAL<br/> PAPIEKTISKAKGQPREPQVYTLPPSRDELTKNQVSLTCLVKGFYPSDIAVEWESNGQPENNYKTPPV<br/> LDSDGSFFLYSKLTVDKSRWQQGNVFCSCVMHEALHNHYTQKSLSLSPGK</p> <p>Light chain (Anti-PDL1)</p> <p>DIVLTQSPASLA VSPGQRATITCRASESVSIHGTHLMHWYQQKPGQPPLLIYAASKLESVGPARGSGS<br/> GSGTDFTLTINPVEAEDTANYYCQQSFEDPLTFGQGTGLEIKRTVAAPSVFIFPPSDEQLKSGTASVVC<br/> LLNNFYPREAKVQWKVDNALQSGNSQESVTEQDSKSTYLSSTLTLSKADYEKHKVYACEVTHQG<br/> LSSPVTKSFNRGEC</p> <p>Variable heavy chain (Anti-PDL1)</p> <p>QVQLVQSGAEVKKPGASVKVSCKASGYTFTSYWMHWVRQAPGQGLEWMGRITPSSGFAMYNEKF<br/> KNRVTMTRDTSTSTVYMELSSLRSEDNAVYYCARGGSSYDYFDYWGQGTITVTVSS</p> <p>Variable light chain (Anti-PDL1)</p> <p>DIVLTQSPASLA VSPGQRATITCRASESVSIHGTHLMHWYQQKPGQPPLLIYAASKLESVGPARGSGS<br/> GSGTDFTLTINPVEAEDTANYYCQQSFEDPLTFGQGTGLEIK</p> |
| HuPL721-T235<br>3-scFab | TIGIT×PD-L1 | NA                                                                                                                                                                                                                                                                                                                                                                                                                                                                                                                                                                                                                                                                                                                                                                                                                                                                                                                                                                                                                                                                                                                                                                               |
| PM-1022                 | TIGIT×PD-L1 | NA                                                                                                                                                                                                                                                                                                                                                                                                                                                                                                                                                                                                                                                                                                                                                                                                                                                                                                                                                                                                                                                                                                                                                                               |
| CX694                   | CD28×PD-L1  | <p>Variable heavy chain (Anti-PD-L1)</p> <p>EVQLLESGGGEVQPGGSLRLSCAASGGIFAIPISWYRQAPGKQREWSTTTSSGATNYAESVKGRFT<br/> ISRDNANKNTLYLQMSSLRAEDNAVYYCNVFEYWGQGTITVTVKP</p> <p>Variable heavy chain (Anti-CD28)</p> <p>EVQLVQSGGGLVQTGGSLRLSCAASGRMFSNYAMGWFRQAPGKEREFVAAINYRRDSADYADSVK<br/> GRFTISRDNANKNTVYLEMNSLKPEDTAIYYCGFTYAGWASSRRDDYNYWGQGTQVTVKP</p> <p>Fc domain</p> <p>PAPGGPSVFLFPPKPKDTLMISRTPEVTCVVDVSHEDPEVKFNWYVDGVEVHNAKTKPREEQYNST<br/> YRVVSVLTVLHQDWLNGKEYKCKVSNKALPAPIEKTISKAKGQPREPQVYTLPPSRDELTKNQVSLT<br/> CLVKGFYPSDIAVEWESNGQPENNYKTPPVLDSDGSFFLYSKLTVDKSRWQQGNVFCSCVMHEAL<br/> HNHYTQKSLSLSPGK</p> <p>Linker</p> <p>GGSGGGGS</p>                                                                                                                                                                                                                                                                                                                                                                                                                                                                                                                           |
| Ab-1                    | CD28×PD-L1  | NA                                                                                                                                                                                                                                                                                                                                                                                                                                                                                                                                                                                                                                                                                                                                                                                                                                                                                                                                                                                                                                                                                                                                                                               |
| XENP-36764              | CD28×PD-L1  | <p>Heavy chain-anti-PD-L1</p> <p>EVQLLESGGGLVQPGGSLRLSCAASGFTFSYDMSWVRQAPGKRLEWVSTISSGGSFTHYPDSVKGR<br/> FTISRDNANKNTLYLQMNSLRAEDNAVYYCVRMSGDWYFDVWGAGTTVTVSSASTKGPSVFPLAPSS<br/> KSTSGGTAALGCLVKDYFPEPVTVSWNSGALTSGVHTFPAVLQSSGLYSLSSVTVTPSSSLGTQTYIC<br/> NVNHKPSDTKVDKKVEPKSCDKTHTCPPCPAPPVAGPSVFLFPPKPKDTLMISRTPEVTCVVDVKH<br/> EDPEVKFNWYVDGVEVHNAKTKPREEYNSTYRVVSVLTVLHQDWLNGKEYKCKVSNKALPAPIE<br/> KTISKAKGQPREPQVYTLPPSREEMTKNQVSLTCDVSGFYPSDIAVEWESDGPENNYKTPPVLDSD<br/> GSFFLYSKLTVDKSRWEQGVDFSCSVLHEALHSHYTQKSLSLSPGK</p>                                                                                                                                                                                                                                                                                                                                                                                                                                                                                                                                                                                                                                             |

|             |            |                                                                                                                                                                                                                                                                                                                                                                                                                                                                                                                                                                                                                                                                                                                                                                                                                                                                                                                                                                                                                                                              |
|-------------|------------|--------------------------------------------------------------------------------------------------------------------------------------------------------------------------------------------------------------------------------------------------------------------------------------------------------------------------------------------------------------------------------------------------------------------------------------------------------------------------------------------------------------------------------------------------------------------------------------------------------------------------------------------------------------------------------------------------------------------------------------------------------------------------------------------------------------------------------------------------------------------------------------------------------------------------------------------------------------------------------------------------------------------------------------------------------------|
|             |            | <p>CD28 scFv</p> <p>EVQLLESGGGLVQPGGSLRLSCAASGFTFSSYYMSWVRQAPGKGLEWVSTISESGDSTYYADSVKGR<br/>FTISRDNKNTLYLQMNSLRAEDTAVYYCAKSGPGLRQVGFDYWGQGTLLTVSSGKPGSGKPGSGK<br/>PGSGKPGSDIQMTQSPSSLSASVGDRVTITCRASQSISSYLNWYQQKPGKAPKLLIYAASSLQSGVPSR<br/>FSGSGSGTDFTLTISSLQPEDFATYYCQQSYSTPFTFGQGTKLEIKEPKSSDKTHTCPPCPAPPVAGPSV<br/>FLFPPKPKDTLMISRTPEVTCVVDVKHEDPEVKFNWYVDGVEVHNAKTKPREEQYNSTYRVVSVL<br/>TVLHQDWLNGKEYKCKVSNKALPAPIEKTISKAKGQPREPQVYTLPPSREQMTKNQVKTCLVKGF<br/>YPSDIAVEWESNGQPENNYKTTTPVLDSDGSFFLYSKLTVDKSRWQQGNVFSCSVLHEALHSHYTQK<br/>SLSLSPGK</p> <p>Light chain-anti-PD-L1</p> <p>EIVLTQSPGTLISLSPGERATLSCRVSSTSSISNLHWYQQKPGQSPRLIYGTSNLASGVPVRFSGSGSGT<br/>DYTLISRLEPEDFAVYYCQQWSSYPLYTFGGGTKVEIKRTVAAPSVFIFPPSDEQLKSGTASVCLLN<br/>NFYPREAKVQWKVDNALQSGNSQESVTEQDSKDYSLSTLTLSKADYEKHKVYACEVTHQGLSS<br/>PVTKSFNRGEC</p>                                                                                                                                                                                                                              |
| CDX-527     | CD27×PD-L1 | <p>Heavy chain</p> <p>EVQLVESGGGLVQPGGSLRLSCAASGGIISTYWMSWVRQAPGKGLEWVANIKQDGSEKYYVDSVK<br/>GRFTISRDNKNSLYLQMNSLRVEDTAMYYCARDPVAGASALWGQGTLLTVSSASTKGPSVFPLA<br/>PSSKSTSGGTAALGCLVKDYFPEPVTVSWNSGALTSGVHTFPAVLQSSGLYSLSSVTVPSSSLGTQT<br/>YICNVNHKPSNTKVDKKVEPKSCDKTHTCPPCAPELLGGPSVFLFPPKPKDTLMISRTPEVTCVVD<br/>VSHEDPEVKFNWYVDGVEVHNAKTKPREEQYNSTYRVVSVLTVLHQDWLNGKEYKCKVSNKALP<br/>APIEKTISKAKGQPREPQVYTLPPSRDELTKNQVSLTCLVKGFYPSDIAVEWESNGQPENNYKTTTPV<br/>LSDGSFFLYSKLTVDKSRWQQGNVFSCSVMEALHNHYTQKSLSLSPGKGSSGGGGSEIVMTQSPA<br/>TLSPVSPGERATLSCRASQSIRSNLAWYQQKPGQAPRLIYGASTRATGIPARFSGSGSGTEFTLTISLQ<br/>SENFVYYCQQYNNWPLTFGCGTKVEIKGGGGSGGGSGGGSGGGGSQVQLVQSGAEVKKPGAS<br/>VKVSKASGYTFTGYYIHWRQAPGQCLEWMGWNPNSGGTNSAQKFQDRVTITRVTSINTAYMEL<br/>SRLRSDDTAVYFCARDRLVLPWFGEIFDAFDIWGQGTLLTVSS</p> <p>Light chain</p> <p>DIQMTQSPSTLSASVGDRVTITCRASQSIGWLAWYQQKPGKAPKLLIYKASSLESVPSRFSGSGSGT<br/>EFTLTISLQPDFAVYYCQQYYGSSRTFGQGTNVEIKRTVAAPSVFIFPPSDEQLKSGTASVCLLNN<br/>FYPREAKVQWKVDNALQSGNSQESVTEQDSKDYSLSTLTLSKADYEKHKVYACEVTHQGLSSP<br/>VTKSFNRGEC</p> |
| 28A10 x 2E4 | OX40×PD-L1 | <p>Variable heavy chain (28A10)</p> <p>QVQLQESGGGLVQAGGSLRLACTTSGGLFNIRPISWYRQPPGMQREWVATIAFGGATNYANSIKGRF<br/>TASRDNAKNTVYLQMNLKPEDTAVYYCNAFEIWGQGTQVTV</p> <p>CDR1 variable heavy chain (28A10)</p> <p>GGIFNIRP</p> <p>CDR2 variable heavy chain (28A10)</p> <p>IAFGGAT</p> <p>CDR3 variable heavy chain (28A10)</p> <p>NAFEI</p> <p>Variable heavy chain (2E4)</p> <p>QVQLQQSGGGLVQPGGSLSLSCVASGILSHNEMRWYRQNPQKPRDLVAGITSAAYTYYGDFVKGR<br/>FTISRDNKNTAYLQMDRLNPEDTGNYICEVSDGDNRYWGQGTQATV</p>                                                                                                                                                                                                                                                                                                                                                                                                                                                                                                                                                            |
| IBI-327     | OX40×PD-L1 | anti-PD-L1/OX40 bispecific antibody peptide 1                                                                                                                                                                                                                                                                                                                                                                                                                                                                                                                                                                                                                                                                                                                                                                                                                                                                                                                                                                                                                |

|             |            |                                                                                                                                                                                                                                                                                                                                                                                                                                                                                                                                                                                                                                                                                                                                                                                                                                                                                                                                                                                                                                                           |
|-------------|------------|-----------------------------------------------------------------------------------------------------------------------------------------------------------------------------------------------------------------------------------------------------------------------------------------------------------------------------------------------------------------------------------------------------------------------------------------------------------------------------------------------------------------------------------------------------------------------------------------------------------------------------------------------------------------------------------------------------------------------------------------------------------------------------------------------------------------------------------------------------------------------------------------------------------------------------------------------------------------------------------------------------------------------------------------------------------|
|             |            | <p>QVQLVQSGAEVKKPGASVKVSCKASGYTFTSYMHWVRQAPGQGLEWMGIINPSGGSTSYAQKFQGRVTMTRDTSTSTVYMESSLRSEDNAVYYCARDHASSSWYTTHLDLWGRGTLTVSSASTKGPSVFPLAPCSRSTSESTAALGCLVKDYFPEPVTVSWNSGALTSGVHTFPAVLQSSGLYSLSSVTVPSNFGTQTYTCNVDHKPSNTKVDKTVKCCVECPAPPVAGPSVFLFPPKPKDTLMISRTPEVTCVVVDVSHEDPEVQFNWYVDGVEVHNAKTKPREEQFNSTFRVSVLTVVHQDWLNGKEYCKVSNKGLPAPIEKTISKTKGQPREPQVYTLPPSREEMTKNQVSLTCLVKGFYPSDIAVEWESNGQPENNYKTPPMLDSDGSEFFLYSKLTVDKSRWQQGNVFSCSVMHEALHNHYTQKSLSLSPGSGGGGGSGGGGSQVQLQESGGGLVQPGGSLRLSCAASAYTISRNSMGWFRQAPGKGLEGVAAIESDGSTSYSDSVKGRFTISLDNSKNTLYLEMNSLRAEDNAVYYCAAPKVGLGPRTALGHLAFMTLPALNYWGQGLTVT</p> <p>anti-PD-L1/OX40 bispecific antibody peptide 2</p> <p>DIQMTQSPSSLSASVGDRVTITCQASQDISNYLNWYQQKPGKAPKLLIYDASNLETGVPSRFSGSGGTDFITFTISLQPEDATYYCQQSANYPTYFGGGTKVEIKRTVAAPSVFIFPPSDEQLKSGTASVCLLNNFYPREAKVQWKVDNALQSGNSQESVTEQDSKSTSYLSSTLTLSKADYEKHKVYACEVTHQGLSSPVTCSFNRGEC</p> <p>PD-L1 nanobody</p> <p>QVQLQESGGGLVQPGGSLRLSCAASAYTISRNSMGWFRQAPGKGLEGVAAIESDGSTSYSDSVKGRFTISLDNSKNTLYLEMNSLRAEDNAVYYCAAPKVGLGPRTALGHLAFMTLPALNYWGQGLTVTVSS</p> |
| MEDI-1109   | OX40×PD-L1 | NA                                                                                                                                                                                                                                                                                                                                                                                                                                                                                                                                                                                                                                                                                                                                                                                                                                                                                                                                                                                                                                                        |
| BS-813      | OX40×PD-L1 | <p>Heavy chain</p> <p>QYQLYQSGAEYKKPGSSYKYSCKASGFTSSSYISWYRQAPGQGLEWIAWIYAGTGGTSYNQKFTGRATITVDESTSTAYMESSLRSEDNAVYYCARHEGVYWFYFDVWGQGTITVTVSSASTKGPSVFPLAPSSKSTSGGTAALGCLVKDYFPEPVTVSWNSGALTSGVHTFPAVLQSSGLYSLSSVTVPSSSLGTQTYICNVNHPKPSNTKVDKKVEPKSCDKTHTCPPCPAPEAAGGPSVFLFPPKPKDTLMISRTPEVTCVWDVSHEDPEVKFNWYVDGVEVHNAKTKPREEQYNSTYRVSVLTVLHQDWLNGKEYCKVSNKALPAPIEKTISKAKGQPREPQVYTLPPSRDELTKNQVSLTCLVKGFYPSDIAVEWESNGQPENNYKTPPVLDSDGSFFLYSKLTVDKSRWQQGNVFSCSVMHEALHNHYTQKSLSLSPGSGGGGGSGGGGSDIQMTQSPSSLSASVGDRVTITCRASQDIRTYLNWYQQKPGKVPKLLIYYTSRLHSGVPSRFSGSGGTDTYTLTISLQPEDVATYYCQQGNTLPWTFGGGTKEIKGGGGSGGGGGSGGGGSQVQLVQSGAEVKKPGSSVKVSCKASGYTFTSYIMHWVRQAPGQGLEWIGYINPYNSGTYNEKFKGRVTTISDKSTSTAYMESSLRSEDNAVYYCAHYYGSTFTMDYWGQGTITVTVSS</p> <p>Light chain</p> <p>EIVLTQSPATLSLSPGERATLSCSASSSVSYMHWYQQKPGQAPRPWIYDTSNLSAGFPARFSGSGGTDFTLTISLPEDEFAVYYCHQRSSYPWTFGGGTKEIKRTVAAPSVFIFPPSDEQLKSGTASVCLLNNFYPREAKVQWKVDNALQSGNSQESVTEQDSKSTSYLSSTLTLSKADYEKHKVYACEVTHQGLSSPVTCSFNRGEC</p>                                                              |
| KN-052      | OX40×PD-L1 | NA                                                                                                                                                                                                                                                                                                                                                                                                                                                                                                                                                                                                                                                                                                                                                                                                                                                                                                                                                                                                                                                        |
| EMB-09      | OX40×PD-L1 | NA                                                                                                                                                                                                                                                                                                                                                                                                                                                                                                                                                                                                                                                                                                                                                                                                                                                                                                                                                                                                                                                        |
| L52-2D7H232 | OX40×PD-L1 | <p>L52-2D7H232 Heavy chain</p> <p>DVQLVESGGGLVQPGGSLRLSCAASGFTASIGMRWFRQAPGKGREL VAGIVDAGSATYYADSVKGRFTISRDNAKNTVYQLQMNSLRAEDNAVYYCARGNHEGEVGLDYWGQGTQVTVSASEFGGGGGSGGGGGSDVQLVESGGGLVQPGGSLRLSCAASGFTASIGMRWFRQAPGKGREL VAGIVDAGSATY YADSVKGRFTISRDNAKNTVYQLQMNSLRAEDNAVYYCARGNHEGEVGLDYWGQGTQVTVSASGGGGSGGGGGSGGGGSLEQVQLVESGGGLVQPGGSLRLSCTVSGIDLSSYDMTWVRQAPGKGLEYIGYISYVSRITYYADSVKGRFTISKDTSKNTVYQLQMNSLRAEDNAVYYCARDRPDGAATNLWGQGLTVTVS</p>                                                                                                                                                                                                                                                                                                                                                                                                                                                                                                                                                                                                        |

|                     |             |                                                                                                                                                                                                                                                                                                                                                                                                                                                                                                                                                                                                                                                                                                                                                                                                                                                                                                                                                                                                              |
|---------------------|-------------|--------------------------------------------------------------------------------------------------------------------------------------------------------------------------------------------------------------------------------------------------------------------------------------------------------------------------------------------------------------------------------------------------------------------------------------------------------------------------------------------------------------------------------------------------------------------------------------------------------------------------------------------------------------------------------------------------------------------------------------------------------------------------------------------------------------------------------------------------------------------------------------------------------------------------------------------------------------------------------------------------------------|
|                     |             | <p>SASTKGPSVFPLAPSSKSTSGGTAALGCLVKDYFPEPVTWNSGALTSKVHPTFAVLQSSGLYSLSSVVTVPSSSLGTQTYICNVNHKPSNTKVDKKVEPKSCDKTHTCPPCPAPELLGGPSVFLFPPKPKDTLMISRTPEVTCVVDVSHEDPEVKFNWYVDGVEVHNAKTKPREEQYNSTYRVVSVLTVLHQDWLNGKEYKCKVSNKALPAPIEKTISKAKGQPREPQVYTLPPSRDELTKNQVSLTCLVKGFYPSDIAVEWESNGQPENNYKTTTPVLDSDGSFFLYSKLTVDKSRWQQGNVFSCSVMHEALHNHYTQKSLSLSP</p> <p>L52-2D7H232 Light chain</p> <p>DIQMTQSPSTLSASVGDRVTITCQSSQNVYSNNRLSWYQQKPGKAPKLLIYWTSFLASGVPSRFSGSGSGTEFTLTISSLQPDFAFYTCAGGYSGNLYTFGGQGTKLEIKRTVAAPSVFIFPPSDEQLKSGTASVVCLLNNFYPREAKVQWKVDNALQSGNSQESVTEQDSKSTYLSSTLTLSKADYEKHKVYACEVTHQGLSSPVTKSFNRGEC</p> <p>L52-2D7H232 Variable light chain</p> <p>DIQMTQSPSTLSASVGDRVTITCQSSQNVYSNNRLSWYQQKPGKAPKLLIYWTSFLASGVPSRFSGSGSGTEFTLTISSLQPDFAFYTCAGGYSGNLYTFGGQGTKLEIKR</p> <p>CDR1 variable heavy chain region (Anti-OX40)</p> <p>GFTASIYGMR</p> <p>CDR2 variable heavy chain region (Anti-OX40)</p> <p>GIVDAGSATYYAD</p> <p>CDR3 variable heavy chain region (Anti-OX40)</p> <p>GNHEGEVGLDY</p>             |
| ES-101              | CD137×PD-L1 | NA                                                                                                                                                                                                                                                                                                                                                                                                                                                                                                                                                                                                                                                                                                                                                                                                                                                                                                                                                                                                           |
| MCLA-145            | CD137×PD-L1 | NA                                                                                                                                                                                                                                                                                                                                                                                                                                                                                                                                                                                                                                                                                                                                                                                                                                                                                                                                                                                                           |
| ATG-101             | CD137×PD-L1 | <p>Heavy chain</p> <p>QVQLVQSGAEVKKPGSSVKVSCKASRGPSTYAIWVRQAPGQGLEWMGRIIPILGIANYAQKFQGRVTITADKSTSTAYMELSSLRSEDTAVYYCARTMEGYGFGNFDYWGQGLTVTVSSASTKGPSVFPLAPSSKSTSGGTAALGCLVKDYFPEPVTWNSGALTSKVHPTFAVLQSSGLYSLSSVVTVPSSSLGTQTYICNVNHKPSNTKVDKKVEPKSCDKTHTCPPCPAPELLGGPSVFLFPPKPKDTLMISRTPEVTCVVDVSHEDPEVKFNWYVDGVEVHNAKTKPREEQYASTYRVVSVLTVLHQDWLNGKEYKCKVSNKALPAPIEKTISKAKGQPREPQVYTLPPSREEMTKNQVSLTCLVKGFYPSDIAVEWESNGQPENNYKTTTPVLDSDGSFFLYSKLTVDKSRWQQGNVFSCSVMHEALHNHYTQKSLSLSPGGGGSGGGSGGGGSQVQLVESGGGLVQPGGSLRLSCAASGFTFSSYAMSWVRQAPGKGLEWVSAISGSGGSTYYADSVKGRFTISRDN SKNTLYLQMNSLR AEDTAVYYCAKTNWGPSDAFDIWGQGTMTVTVSSASTGGGGSGGGSGGGGSQSVLTQPPSASGTPGQRTVISCSTDSIGSYSVNWYQQLPGTAPKLLIYSNNQRPSGVPDRFSGSKSGTSASLAISGLQSEADYYCAAWDDSLNGYVFGTGTKLTVLG</p> <p>Light chain</p> <p>QSALTQPASVSGSPGQSITISCTGTVEVGGYNEVSWYQQHPGKAPKLMYGNNSNRPSGVSNRFSGSGSGNTASLTISGLQAEDADYYCQSYDSSLSGTVFGGGTKLTVLGQPKAAPSVTLFPPSSEELQANKATLVCLISDFYPGAVTVAWKADSSPVKAGVETTPSKQSNKYAASSYLSLTPEQWKSHRYSYSCQVTHEGSTVEKTVAPTECS</p> |
| ABL-503             | CD137×PD-L1 | NA                                                                                                                                                                                                                                                                                                                                                                                                                                                                                                                                                                                                                                                                                                                                                                                                                                                                                                                                                                                                           |
| FS-222              | CD137×PD-L1 | NA                                                                                                                                                                                                                                                                                                                                                                                                                                                                                                                                                                                                                                                                                                                                                                                                                                                                                                                                                                                                           |
| S-095012            | CD137×PD-L1 | NA                                                                                                                                                                                                                                                                                                                                                                                                                                                                                                                                                                                                                                                                                                                                                                                                                                                                                                                                                                                                           |
| AP-203              | CD137×PD-L1 | NA                                                                                                                                                                                                                                                                                                                                                                                                                                                                                                                                                                                                                                                                                                                                                                                                                                                                                                                                                                                                           |
| 4-1BB<br>(20H4.9) x | CD137×PD-L1 | <p>Heavy chain</p> <p>DIQMTQSPSSLSASVGDRVTITCRASQDVSTAVAWYOOKPGKAPKIAIYSASFLYSGVPSRFSGSGSG</p>                                                                                                                                                                                                                                                                                                                                                                                                                                                                                                                                                                                                                                                                                                                                                                                                                                                                                                               |

|          |             |                                                                                                                                                                                                                                                                                                                                                                                                                                                                                                                                                                                                                                                                                                                                                                                                                                                                                                                                                                                                                                                                                                                                                                                                                                               |
|----------|-------------|-----------------------------------------------------------------------------------------------------------------------------------------------------------------------------------------------------------------------------------------------------------------------------------------------------------------------------------------------------------------------------------------------------------------------------------------------------------------------------------------------------------------------------------------------------------------------------------------------------------------------------------------------------------------------------------------------------------------------------------------------------------------------------------------------------------------------------------------------------------------------------------------------------------------------------------------------------------------------------------------------------------------------------------------------------------------------------------------------------------------------------------------------------------------------------------------------------------------------------------------------|
| PD-L1    |             | <p>TQFTLTISLQPEDFATYYCOQYLHPATFGOGTKVEIKSSASTKGPSVFPLAPSSKSTSGGTAALGCLVKDYFPEPVTVSWNSGALTSGVHTFPAVLQSSGLYSLSSVVTVPSSSLGTQTYICNVNHKPSNTKVDKKVEPKSCDGGGGSGGGGSQVQLQQWGAGLLKPSETLSLTCAVYGGSFSGYYWSWIRQSPEKGLEWIGEINHGGYVTYNPSLESRVTISVDTSKNQFSLKLSSVTAADTAVYYDARDYGPNGYDWYFDLWGRGTLVTVSSASTKGPSVFPLAPSSKSTSGGTAALGCLVEDYFPEPVTVSWNSGALTSGVHTFPAVLQSSGLYSLSSVVTVPSSSLGTQTYICNVNHKPSNTKVDKVEPKSCDKTHTCPPCPAPEAAGGPSVFLFPPKPKDTLMISRTPEVTCVVVDVSHEDPEVKFNWYVDGVEVHNAKTKPREEQYNSTYRVVSVLTVLHQDWLNGKEYKCKVSNKALGAPIEKISKAKGQPREPQVYTLPPCRDELTKNQVSLWCLVKGFYPSDIAVEWESNGQPENNYKTTTPVLDSCGSFFLYSKLTVDKSRWQOGNVFSCSVMEALHNHYTOKSLSLSP</p> <p>Light chain</p> <p>EVQLVESGGGLVQPGGSLRLSCAASGFTFSDSWIHWVRQAPGKGLEWVAWISPYGGSTYYADSVKGRFTISADTSKNTAYLQMNSLFAEDTAVYYCARRHWPGGFDYWGQGLTVTVSSASVAAPSVFIFPPSECI LKSGTASVVCLLNNFYPREAKVOWKVDNALOSGNSQESVTEODSKDSTYSISSTLTLSKADYEKHKVYACEVTHOGLSSPVTKSFNRGEC</p>                                                                                                                                                                                                                                                                                                                                                   |
| GEN-1046 | CD137×PD-L1 | NA                                                                                                                                                                                                                                                                                                                                                                                                                                                                                                                                                                                                                                                                                                                                                                                                                                                                                                                                                                                                                                                                                                                                                                                                                                            |
| LBL-024  | CD137×PD-L1 | <p>Variable heavy chain (Anti-4-1BB)</p> <p>QVQLQESGGGLVQPGGSLRLSCAVSGFTFSSYAMHWVRQAPGKCLEWVAVISYDGSKKWAYADSVKGRFTISRDNSKNTLYLQMNSLRAEDTAVYYCARNQGSGLYLYYYMDVWGKGTITVTVSS</p> <p>CDR1 variable heavy chain (Anti-4-1BB)</p> <p>SYAMH</p> <p>CDR2 variable heavy chain (Anti-4-1BB)</p> <p>VISYDGSKKWAYADSVKG</p> <p>CDR3 variable heavy chain (Anti-4-1BB)</p> <p>NQGSGLYLYYYMDV</p> <p>Variable light chain (Anti-4-1BB)</p> <p>QSALTQPRSVSGSPGQSVTISCTGTSSDVGGYNYVSWYQQLPGKAPKVIIEVSNRPSGVSNRFSGSKSGNTASLTISGVQSEADYYCSSYTSSTFYVFGCGTQLTVL</p> <p>CDR1 variable light chain (Anti-4-1BB)</p> <p>TGTSSDVGGYNYVS</p> <p>CDR2 variable light chain (Anti-4-1BB)</p> <p>EVSNRPS</p> <p>CDR3 variable light chain (Anti-4-1BB)</p> <p>SSYTSSTFYV</p> <p>Variable heavy chain (Anti-PD-L1)</p> <p>EVQLQESGPGLVKPSQTLSTCTVSGDSFSSGYWNWIRQHPGKLEYIGYVSYTGSTYYIPSLKSRVTISRDTSKNQFSLKLSSVTAADTAVYYCAGYRDWLHGYFDYWGQGTITVTVSS</p> <p>CDR1 variable heavy chain (Anti-PD-L1)</p> <p>SGYWN</p> <p>CDR2 variable heavy chain (Anti-PD-L1)</p> <p>YVSYTGSTYYIPSLKS</p> <p>CDR3 variable heavy chain (Anti-PD-L1)</p> <p>YRDWLHGYFDY</p> <p>Variable light chain (Anti-PD-L1)</p> <p>DIQMTQSPSSLSASVGDRVTITCKASQNVMDNVAWYQQKPGKAPKRLIYSASYRFGVPSRFSGSGS</p> |

|                   |             |                                                                                                                                                                                                                                                                                                                                                                                                                                                                                                                                                                                                                                                                                                                                                                                                                                                                                                                                                                                                                                                                                                                       |
|-------------------|-------------|-----------------------------------------------------------------------------------------------------------------------------------------------------------------------------------------------------------------------------------------------------------------------------------------------------------------------------------------------------------------------------------------------------------------------------------------------------------------------------------------------------------------------------------------------------------------------------------------------------------------------------------------------------------------------------------------------------------------------------------------------------------------------------------------------------------------------------------------------------------------------------------------------------------------------------------------------------------------------------------------------------------------------------------------------------------------------------------------------------------------------|
|                   |             | <p>GTEFTLTISLQPEDFATYYCQQYNGYPLTFGQGGTKLEIK</p> <p>CDR1 variable light chain (Anti-PD-L1)</p> <p>KASQNVMDNVA</p> <p>CDR2 variable light chain (Anti-PD-L1)</p> <p>SASYRFS</p> <p>CDR3 variable light chain (Anti-PD-L1)</p> <p>QQYNGYPLT</p>                                                                                                                                                                                                                                                                                                                                                                                                                                                                                                                                                                                                                                                                                                                                                                                                                                                                          |
| 9EN-FM            | CD137×PD-L1 | <p>First polypeptide chain</p> <p>QVQLVQSGAEVKKPGASVKVSKASGYTFTSYWMHWVRQAPGQGLEWMGRIGPNSGFTSYNEKF<br/> KNRVTMTRDTSTSTVYMESSLRSEDVAVYYCARGGSSYDYFDYWGQGTITVTVSSGGGSGGGGS<br/> GGGGSDIVLTQSPASLAVSPGQRATITCRASESVSIHGTHLMHWYQKPKGPPLLIYAASNLESGVP<br/> ARFSGSGSGTDFTLTINPVEAEDTANYYCQQSFEDPLTFGQGGTKLEIKGGGSGGGSGGGSGGGG<br/> SEVQLVQSGAEVKKPGSSVKVSKASGYTFTSYGLNHWVRQAPGQRLWGMGINPGSGYTKYNEKF<br/> EGRVTITADKSTSTAYMELSSLRSEDVAVYFCARWGLGRNWNFAVWGQGTITVTVSSASTKGPSVFP<br/> LAPSSKSTSGGTAALGCLVKDYFPEPVTVSWNSGALTSGVHTFPAVLQSSGLYSLSSVTVTPSSSLGT<br/> QTYICNVNHKPSNTKVDKKVEPKCDKTHTCPPCPAPEAAGGPSVFLFPPKPKDTLMISRTPEVTCVV<br/> VDVSHEDPEVKFNWYVDGVEVHNAKTKPREEQYNSTYRVVSVLTVLHQDWLNGKEYKCKVSNKA<br/> LGAPIEKISKAKGQPREPQVYTLPPSREEMTKNQVSLTCLVKGFYPSDIAVEWESNGQPENNYKTP<br/> PVLDSGDSFFLYSKLTVDKSRWQQGNVFCFSVMHEALHNHYTQKSLSLSPGK</p> <p>Second polypeptide chain</p> <p>DIVMTQSPDSLAVSLGERATINCRASESVDSYGNTFMHWYQKPKGPPLLIYRASQLESGVPDRFS<br/> GSGSGTDFTLTISLQAEADVAVYYCQQSNEDPLTFGQGGTKLEIKRTVAAPSVFIFPPSDEQLKSGTASV<br/> VCLLNNFYPREAKVQWKVDNALQSGNSQESVTEQDSKSTYLSSTLTLSKADYEKHKVYACEVTH<br/> QGLSSPVTKSFNRGEC</p> |
| PM-1003           | CD137×PD-L1 | NA                                                                                                                                                                                                                                                                                                                                                                                                                                                                                                                                                                                                                                                                                                                                                                                                                                                                                                                                                                                                                                                                                                                    |
| QL-301            | CD137×PD-L1 | NA                                                                                                                                                                                                                                                                                                                                                                                                                                                                                                                                                                                                                                                                                                                                                                                                                                                                                                                                                                                                                                                                                                                    |
| MF6797xMF77<br>02 | CD137×PD-L1 | <p>Variable heavy chain (Anti-CD137)</p> <p>QITLKESGPTLVKPTQTLTLCTFSGFSLSTTGVGVNWIRQPPGEALEWLALIYWNDTTYSPSLKSRL<br/> TITKDTSKNQVVLMTNMDPVDATYYCAHEGIIGFLGGNWFDPWGQGTITVTVSS</p> <p>CDR1 variable heavy chain (Anti-CD137)</p> <p>TTGVGVN</p> <p>CDR2 variable heavy chain (Anti-CD137)</p> <p>LIYWNDTTYSPSLKS</p> <p>CDR3 variable heavy chain (Anti-CD137)</p> <p>EGIIIGFLGGNWFDP</p> <p>CDR1 variable heavy chain (Anti-PD-L1)</p> <p>DRKYVTNWVFAEDFQH</p> <p>CDR2 variable heavy chain (Anti-PD-L1)</p> <p>WINPNTGNPTYAQGFTG</p> <p>CDR3 variable heavy chain (Anti-PD-L1)</p> <p>NYAIN</p> <p>Variable heavy chain (Anti-PD-L1)</p> <p>QVQLVQSGSELKKPGASVKVSKASGYTFTNYAINWVRQAPGQGLEWMGWINPNTGNPTYAQGFT<br/> GRFVFSLDTSVSTAYLQISSLKAEDTAVYYCARDKYVTNWVFAEDFQHWGRGTLTVTVSS</p>                                                                                                                                                                                                                                                                                                                                     |

|                          |             |                                                                                                                                                                                                                                                                                                                                                                                                                                                                                                                                                                                                                                                                                                                                                                                                                                                                                                                                                                                                                                                                          |
|--------------------------|-------------|--------------------------------------------------------------------------------------------------------------------------------------------------------------------------------------------------------------------------------------------------------------------------------------------------------------------------------------------------------------------------------------------------------------------------------------------------------------------------------------------------------------------------------------------------------------------------------------------------------------------------------------------------------------------------------------------------------------------------------------------------------------------------------------------------------------------------------------------------------------------------------------------------------------------------------------------------------------------------------------------------------------------------------------------------------------------------|
| BH-3120                  | CD137×PD-L1 | NA                                                                                                                                                                                                                                                                                                                                                                                                                                                                                                                                                                                                                                                                                                                                                                                                                                                                                                                                                                                                                                                                       |
| euPD-1×94 kvt<br>LHC 218 | CD137×PD-L1 | <p>FLESPDRPWNAPTFSBALLVAEGDNATFTCSFSNASESFHVVWHRESPSGQTDTLAAFPEDRSQPGQ<br/>DHRFRVTRLNPNRDFHMSVVRARNDSTGYVCGVISLAPKIQIKESLRAELRVTERRAEVPHTAHPSPS<br/>PRPAGQFQTLVVGASGGGGSGGGGSDKTHTCPPCAPEAAGGPSVFLFPPKPKDTLMISRTPEVTCVV<br/>VDVSHEDPEVKFNWYVDGVEVHNAKTKPREEQYNSTYRVVSVLTVLHQDWLNGKEYKCAVSNKA<br/>LPAPIEKTISKAKGQPREPQVYTLPPSREEMTKNQVSLTCLVKGFYPSDIAVEWESNGQPENNYKTTTP<br/>PVLDSGDSFFLYSKLTVDKSRWQQGNVFCSSVMHEALHNHYTQKSLSLSPGSGGGGGSGGGGSDIVMT<br/>QSPAFLSVTPGEKVTITCRASQTISDYLHWYQQKPDQAPKLLIKYASQSSISGIPSRFSGSGSGTDFTFTIS<br/>SLEAEDAATYYCQDGHSWPPTFGQGTKLEIKGSTSGSGKPGSGEGSTKGQVQLVQSGAEVKKPGAS<br/>VKLSCKASGYTFSSYWMHWVRQAPQGQGLEWIGEINPGNGHTNYNEKFKSRVTMTRDTSTSTAYME<br/>LSSLRSEDTAVYYCARSFKTARAFAYWGQGLTVTVSS</p>                                                                                                                                                                                                                                                                                                                                                 |
| PR-004270                | CD137×PD-L1 | <p>Heavy chain</p> <p>DIQMTQSPSTLSASVGDRVTVTCRASQSIYIWLAWYQQKPGKAPNLLIYKASSLETGVPSRFSGSGSG<br/>TEFTLTISLQPDFATYYCQQYYGSSRTFGQGTKVEIKRTVAAPSVFIFPPSDEQLKSGTASVVCLLN<br/>NFYPREAKVQWKVDNALQSGNSQESVTEQDSKSTYLSSTLTLSKADYEKHKVYACEVTHQGLSS<br/>PVTKSFNRGCEPKSSDKTHTPPPEVQLVESGGGVVQPGGSLRLSCAASGFTFSNYAMTWVRQAP<br/>EKGLEWVSSISGSGVSTYYADSVKGRFTISRDNSTNTLYLQMTRLTAEDTAVYFCAKEGSSETDDHY<br/>YNVDVWGQGTITVTSSEPKSSDKTHTCPPCAPEAAGGPSVFLFPPKPKDTLMISRTPEVTCVVVDVS<br/>HEDPEVKFNWYVDGVEVHNAKTKPREEQYNSTYRVVSVLTVLHQDWLNGKEYKCKVSNKALPAPI<br/>EKTISKAKGQPREPQVYTLPPSREEMTKNQVSLTCLVKGFYPSDIAVEWESNGQPENNYKTTTPVLDS<br/>DGSFFLYSKLTVDKSRWQQGNVFCSSVMHEALHNHYTQKSLSLSPGK</p> <p>Light chain</p> <p>EVQLVESGGGLVQPGGSLRLSCAASGFTFSYWMHWVRQAPGKLEWVANIKQEGSEKYYVDSVK<br/>GRFTISRDNKNSLYLQMNSLRAEDTAVYYCARDRAVAGAFDIWGQGTMTVTVSSASTKGPSVFPLA<br/>PSSKSTSGGTAALGCLVKDYFPEPTVSWNSGALTSGVHTFPAVLQSSGLYSLSSVTVPSSSLGTQT<br/>YICNVNHKPSNTKVDKKVEPKSC</p>                                                                                                                                  |
| HK-010                   | CD137×PD-L1 | NA                                                                                                                                                                                                                                                                                                                                                                                                                                                                                                                                                                                                                                                                                                                                                                                                                                                                                                                                                                                                                                                                       |
| 1923Ab18                 | CD137×PD-L1 | <p>Light chain</p> <p>EIVMAQSPATLSLSPGERATLSCRASQSVSSYLSWFQKPGQAPRLLIYGASTRATGIPARFGGSGSG<br/>TDFTLTISLQPEDFAVYYCQQDYNLPYTFGQGTKLEIKRTVAAPSVFIFPPSDEQLKSGTASVVCLLN<br/>NFYPREAKVQWKVDNALQSGNSQESVTEQDSKSTYLSSTLTLSKADYEKHKVYACEVTHQGLSS<br/>PVTKSFNRGEC</p> <p>Heavy chain</p> <p>QVQLVQSGAEVKKPGASVKVCSKASGYFTTSYDINWVRQATGQGLEWMGMWNPNSGITGYAQR<br/>QGRVTMTRDTSISTAYMELSSLRSEDTAVYYCARHRWGKGYLDLWGRGTLTVSSASTKGPSVFPL<br/>APSSKSTSGGTAALGCLVKDYFPEPTVSWNSGALTSGVHTFPAVLQSSGLYSLSSVTVPSSSLGTQ<br/>TYICNVNHKPSNTKVDKKVEPKSCDKTHTCPPCAPEAAGGPSVFLFPPKPKDTLMISRTPEVTCVVV<br/>DVSHEDPEVKFNWYVDGVEVHNAKTKPREEQYNSTYRVVSVLTVLHQDWLNGKEYKCKVSNKAL<br/>PAPIEKTISKAKGQPREPQVYTLPPSRDELTKNQVSLTCLVKGFYPSDIAVEWESNGQPENNYKTTTPV<br/>LDSGDSFFLYSKLTVDKSRWQQGNVFCSSVMHEALHNHYTQKSLSLSPGSGGGGGSGGGGSGVQV<br/>LVESGGGVVQGRSLRLSCAASGFTFSNYGMHWVRQAPGKCLEWVAIIWYDGINKYYADSVKGRFT<br/>ISRDNSTNTLYLQMNSLKAEDTAVYYCARDQDYDILTGYKEDYDFWQGTITVTVSSGGGGSGG<br/>GGSGGGGGSGGGSSYELTQPPSVSPGQTARITCSGDALPKKYAYWYQQKSGQAPVLYIEDSKRP<br/>SGIPERFSGSSSGTMTALTISGAQVEDEADYYCYSTDSSGNRVFGCGTKLTVL</p> |



|         |            |                                                                                                                                                                                                                                                                                                                                                                                                                                                                                                                                                                                                                                                            |
|---------|------------|------------------------------------------------------------------------------------------------------------------------------------------------------------------------------------------------------------------------------------------------------------------------------------------------------------------------------------------------------------------------------------------------------------------------------------------------------------------------------------------------------------------------------------------------------------------------------------------------------------------------------------------------------------|
| KY-1055 | ICOS×PD-L1 | Variable heavy chain (Anti-ICOS)<br>EVQLVESGGGVVRPGGSLRLSCVASGVTFDDYGMSWVRQAPGKGLEWVSGINWNGGDTDYSDSV<br>KGRFTISRDNAKNSLYLQMNSLRAEDTALYYCARDFYGSGSYHVPFDYWGQGILVTVSS<br>Variable light chain (Anti-ICOS)<br>EIVLTQSPGTLSSLSPGERATLSCRASQSVSRSYLAWYQQKRGQAPRLLIYGASSRATGIPDRFSGDGS<br>TDFTLISRLEPEDFAVYYCHQYDMSPFTFGPGTKVDIK<br>CDR1 variable heavy chain (Anti-ICOS)<br>GVTFDDYG<br>CDR2 variable heavy chain (Anti-ICOS)<br>INWNGGDT<br>CDR3 variable heavy chain (Anti-ICOS)<br>ARDFYGSGSYHVPFDY<br>CDR1 variable light chain (Anti-ICOS)<br>QSVSRSY<br>CDR2 variable light chain (Anti-ICOS)<br>GAS<br>CDR3 variable light chain (Anti-ICOS)<br>HQYDMSPF |
|---------|------------|------------------------------------------------------------------------------------------------------------------------------------------------------------------------------------------------------------------------------------------------------------------------------------------------------------------------------------------------------------------------------------------------------------------------------------------------------------------------------------------------------------------------------------------------------------------------------------------------------------------------------------------------------------|
